# **Recovirus NS1-2 has viroporin activity that induces aberrant cellular calcium signaling to facilitate virus replication**

Alicia C. Strtak<sup>1</sup>, Jacob L. Perry<sup>1</sup>, Mark N. Sharp<sup>1,4</sup>, Alexandra L. Chang-Graham<sup>1</sup>, Tibor Farkas<sup>2,3</sup>, and Joseph M. Hyser<sup>1\*</sup>

<sup>1</sup>Alkek Center for Metagenomic and Microbiome Research and Department of Molecular Virology and Microbiology, Baylor College of Medicine, Houston, TX 77303. <sup>2</sup>Department of Pathobiological Sciences, Louisiana State University School of Veterinary Medicine, and <sup>3</sup>Louisianan Animal Disease Diagnostic Laboratory, Baton Rouge, LA 70803. <sup>4</sup>Texas Medical Center Summer Research Internship Program, Augustana College, Rock Island, IL 61201.

Correspondence should be sent to:  
Joseph M. Hyser  
Alkek Center for Metagenomic and Microbiome Research  
Department of Molecular Virology and Microbiology  
MS: BCM385  
Baylor College of Medicine  
Houston, TX, 77303  
PH: 713-798-4514  
FAX: 713-798-3586  
Joseph.Hyser@bcm.edu

No conflicts of interest exist.

## Abstract

Enteric viruses in the *Caliciviridae* family cause acute gastroenteritis in humans and animals, but the cellular processes needed for virus replication and disease remain unknown. A common strategy among enteric viruses, including rotaviruses and enteroviruses, is to encode a viral ion channel (i.e., viroporin) that is targeted to the endoplasmic reticulum (ER) and disrupts host calcium ( $\text{Ca}^{2+}$ ) homeostasis. Previous reports have demonstrated genetic and functional similarities between the nonstructural proteins of caliciviruses and enteroviruses, including the calicivirus NS1-2 protein and the 2B viroporin of enteroviruses. However, it is unknown whether caliciviruses alter  $\text{Ca}^{2+}$  homeostasis for virus replication or whether the NS1-2 protein has viroporin activity like its enterovirus counterpart. To address these questions, we used Tulane virus (TV), a rhesus enteric calicivirus, to examine  $\text{Ca}^{2+}$  signaling during infection and determine whether NS1-2 has viroporin activity that disrupts  $\text{Ca}^{2+}$  homeostasis. We found that TV disrupts increases  $\text{Ca}^{2+}$  signaling during infection and increased cytoplasmic  $\text{Ca}^{2+}$  levels is important for efficient replication. Further, TV NS1-2 localizes to the endoplasmic reticulum (ER), the predominant intracellular  $\text{Ca}^{2+}$  store and the NS2 region has characteristics of a viroporin domain (VPD). NS1-2 had viroporin activity in a classic bacterial functional assay and caused aberrant  $\text{Ca}^{2+}$  signaling when expressed in mammalian cells, but truncation of the VPD abrogated these functions. Together, our data provide new mechanistic insights into the function of the NS2 region of NS1-2 and show that like many other enteric viruses, enteric caliciviruses also exploit host  $\text{Ca}^{2+}$  signaling to facilitate their replication.

## Importance

Tulane virus is one of many enteric caliciviruses that cause acute gastroenteritis and diarrheal disease. Globally, enteric caliciviruses affect both humans and animals and result in >65 billion

dollars per year in treatment and healthcare-associated costs, thus imposing an enormous economic burden. Recent progress has resulted in several cultivation systems (B cell, enteroid and zebrafish larvae) to study human noroviruses, but mechanistic insights into the viral factors and host pathways important for enteric calicivirus replication and infection are largely still lacking. Here we used Tulane virus, a calicivirus that is biologically similar to human noroviruses and can be cultivated in conventional cell culture, to identify and functionally validate NS1-2 as an enteric calicivirus viroporin. Viroporin-mediated calcium signaling may be a broadly utilized pathway for enteric virus replication, and its existence within caliciviruses provides a novel approach to developing antivirals and comprehensive therapeutics for enteric calicivirus diarrheal disease outbreaks.

# Introduction

The *Caliciviridae* family consists of small, non-enveloped single-stranded RNA viruses with five major genera: *Sapovirus*, *Lagovirus*, *Vesivirus*, *Nebovirus*, and *Norovirus* (1, 2). Caliciviruses infect a wide-array of hosts and have importance in medical, veterinary, and agricultural fields (3). Of particular importance are human noroviruses (HuNoVs) that are the leading cause of acute gastroenteritis (AGE) in every age group, and can cause life-threatening illness in the young, immunocompromised, and elderly subpopulations (4–7). Estimates show that every individual will experience at least five symptomatic norovirus infections in their life (8), which underlines the need for anti-viral drugs, vaccines, or anti-diarrheal therapies for HuNoV infection (9, 10). However, many aspects of calicivirus pathogenesis, including that of HuNoV, remain uncharacterized, which represents a challenge to developing effective therapies (4, 6, 9). One strategy to address this challenge is to study other enteric caliciviruses, such as porcine sapoviruses and rhesus enteric caliciviruses (*Recovirus*). Recoviruses are a new proposed genus of enteric CVs initially identified in the stool from rhesus macaques, of which Tulane virus (TV) is the prototype strain (11, 12). While Recoviruses constitute a separate genus, these viruses are most closely related to HuNoVs and studies of TV show that it retains both biologic and genetic similarities to HuNoVs, including genomic organization, tissue tropism (intestinal epithelia), and clinical presentation (self-limiting vomiting and diarrhea) (1, 11–13). Furthermore, TV robustly replicates in cell culture in monkey kidney cell lines (e.g., LLC-MK2 cells), which facilitates investigation into the host pathways exploited by TV during infection. This makes TV an excellent model system to identify host signaling pathways broadly exploited by caliciviruses for replication and pathogenesis.

Like other caliciviruses, TV has 3 main open reading frames (ORFs), with ORF1 encoding the nonstructural proteins (NS1-7), and ORFs2-3 encoding the capsid proteins VPI (ORF2) and VP2 (ORF3) (10, 14-15). During replication ORF1 is synthesized into the polyprotein, which is subsequently cleaved by the viral protease NS6 to produce six nonstructural proteins that orchestrate viral replication (4, 12, 14–16). In particular, the roles of the NS1-2 protein (N-terminal protein) plays in viral replication and pathogenesis are not well-characterized. Recent reports have identified that murine norovirus NS1, the N-terminal portion of NS1-2, antagonizes the interferon pathway, but studies of full-length NS1-2 or the NS2 domain remain limited (17–19). Recombinant expression of NS1-2 from feline calicivirus (FCV), murine norovirus (MNV), and HuNoV GII.4 shows that the protein traffics to the endoplasmic reticulum (ER), concentrates perinuclearly, colocalizes with the ER-resident protein calnexin, and contains C-terminal hydrophobic sequences (20–22). In contrast, Norwalk virus (GI.1) NS1-2 (p48) was primarily found in the Golgi apparatus and implicated in disrupting ER-to-Golgi trafficking (23, 24). The similarities in ER/Golgi membrane association and domain organization of NS1-2 from different viruses suggest that NS1-2 may have a conserved function among caliciviruses.

The ER, and to a lesser extent Golgi apparatus, are important intracellular calcium ( $\text{Ca}^{2+}$ ) storage organelles, with the ER  $\text{Ca}^{2+}$  concentration being up to 1 mM (25, 26). As a ubiquitous secondary messenger,  $\text{Ca}^{2+}$  is at the epicenter of many cellular processes and host machinery tightly regulates  $\text{Ca}^{2+}$  levels to ensure low (nM) cytoplasmic  $\text{Ca}^{2+}$  concentrations at cellular rest (26–32). Importantly,  $\text{Ca}^{2+}$  signaling regulates several aspects of viral life cycles including entry, genome replication, and release (30, 33–35). To exploit  $\text{Ca}^{2+}$  signaling, many viruses express an ion channel (i.e., viroporin) to dysregulate  $\text{Ca}^{2+}$  homeostasis in order to usurp  $\text{Ca}^{2+}$ -dependent

host processes (30, 36–39). The best characterized  $\text{Ca}^{2+}$  disrupting viroporins are the nonstructural protein 4 (NSP4) from rotavirus (RV) and the 2B nonstructural protein of enteroviruses (EV) and some other picornaviruses (36, 37, 40–44). Like all *bona fide* viroporins, NSP4 and 2B have canonical biophysical motifs, including being oligomeric, having an amphipathic  $\alpha$ -helix that forms the pore, and a cluster of basic residues that facilitate membrane insertion (37–39, 42–44). While no study has specifically looked at whether caliciviruses dysregulate  $\text{Ca}^{2+}$  signaling or have a viroporin, they belong to the picornavirus-like superfamily of positive-sense RNA viruses, among which there is considerable positional homology of the cognate proteins of the nonstructural polyprotein (23, 45, 46). Within this rubric, the picornavirus 2AB region constitutes the positional homolog of the calicivirus NS1-2 protein, and several sequence motifs in the NS1 are conserved in the 2A protein of some picornaviruses (23). While no functional homology between EV 2B and the NS2 region of NS1-2 has been yet been identified, it is tempting to speculate that NS1-2 may have viroporin activity and dysregulate host  $\text{Ca}^{2+}$  signaling analogous to that of EV 2B proteins.

In this study, we investigated the role of  $\text{Ca}^{2+}$  signaling in TV replication and whether TV NS1-2 has viroporin activity that can dysregulate  $\text{Ca}^{2+}$  homeostasis. Using long-term live-cell  $\text{Ca}^{2+}$  imaging, we sought to determine whether TV infection causes aberrant  $\text{Ca}^{2+}$  signaling during infection and identify the cellular  $\text{Ca}^{2+}$  pools critical for the TV-induced  $\text{Ca}^{2+}$  signaling. Finally, we tested TV NS1-2 for viroporin activity and determined whether the putative NS1-2 viroporin domain caused aberrant  $\text{Ca}^{2+}$  signaling similar to TV infection.

## Methods

**Cell lines, GECI lentiviruses, and viruses:** All experiments were performed in LLC-MK2 cells. Lentivirus packaging and recombinant protein expression for western blot lysate production was performed in HEK293FT cells (ATCC CRL-3216). Cell lines were grown in high-glucose DMEM (Sigma: D6429) containing 10% fetal bovine serum (FBS) (Corning lot no. 35010167) and antibiotic/antimycotic (Invitrogen), and maintained at 37°C with 5% CO<sub>2</sub>. Lentivirus packaging in HEK293FT cells was performed as previously described (41). Briefly, LLC-MK2 cells were transduced with a lentivirus vector encoding GCaMP6s 1-day post-seeding (~85% confluency). We confirmed positive expression of GCaMP6s at 48-72 hours post-transduction, then passaged cells 1:2 and added hygromycin (100 µg/mL) for selection of the LLC-MK2-GCaMP6s cell lines, henceforth referred to as MK2- G6s. We determined GCaMP6s activity and dynamic range using thapsigargin (0.5µM). Tulane virus (TV) stocks were made in-house by infecting cells with MOI 0.01 and harvesting at ~95% cytopathic effect (CPE). Virus titer was determined by plaque assay. Irradiated virus controls were made by gamma-irradiating TV stocks for 19 hours.

**Replication assays:** LLC-MK2 cells were seeded at 125,000 cells/well in 24 well plates (Costar 3524, Corning) and inoculated next day with TV at MOI 1 for 1 hour. Inoculum was removed, and cell media was replaced containing different extracellular Ca<sup>2+</sup> conditions (0 mM Ca<sup>2+</sup>, 4 mM Ca<sup>2+</sup>), intracellular Ca<sup>2+</sup> chelator 50 µM BAPTA-AM, or the sarco/endoplasmic reticulum calcium ATPase (SERCA) blocker thapsigargin (TG). Ca<sup>2+</sup>-free DMEM was purchased from Gibco (Cat #21068-028). Standard high-glucose DMEM (Sigma) has 1.8 mM CaCl<sub>2</sub>, which we refer to as “2 mM Ca<sup>2+</sup>”, and media with 4 mM Ca<sup>2+</sup> was made by adding 2 mM CaCl<sub>2</sub> to the

standard high-glucose DMEM (Sigma). We maintained TV-infected cells under these conditions until the positive control (normal media) had ~90% CPE. Progeny virus was harvested by 3 freeze/thaw cycles, the virus yield was determined by plaque assay. For plaque assays, cells are seeded at 75,000 cells/well in 24 well plates and 2-days post-seeding, the cells were inoculated for 1 hour with 10-fold serial dilutions of the sample. Then, we removed the inoculum and added the overlay. Overlays for plaque assays was made mixing equal parts 1.2% Avicel (FMC Corporation) and 2X DMEM (Gibco). Plaque assays were harvested at 72 hours; fixed and stained with crystal violet (3% solution) to visualize plaques. Titer is represented as plaque forming units per milliliter (PFU/mL).

**One-step growth curves:** One step growth curves for TV were performed using a modified protocol from previous reports (11, 15). Briefly, LLC-MK2 cells were inoculated with TV at MOI 1 in serum-free DMEM (0% FBS DMEM). At 1-hour post-infection (HPI), the inoculum was removed and replaced with 0% FBS DMEM. Cells were harvested at 0, 4, 6, 8, 10, 12, 16, 20, 24, and 28 HPI and virus yield determined by plaque assay. Each biological replicate was performed in duplicate.

**Long-term  $\text{Ca}^{2+}$  imaging experiments:** Calcium imaging experiments were set up by adapting a protocol detailed in previous reports (47). MK2-G6s cells were seeded at 78,500 cells/well in 15  $\mu$ -slide 8 well chambers (Ibidi, Germany) and infected the next day with TV at the indicated MOI. After one hour, the inoculum was removed and replaced with FluoroBrite DMEM (Gibco). For studies involving pharmacological compounds, the FluoroBrite was mixed with DMSO (0.1%, vehicle control) or the indicated pharmacological compounds dissolved in DMSO. Then



the slide was mounted into a stage-top environmental chamber (Okolab H301-Mini) that maintained 37°C with humidity control and 5% CO<sub>2</sub>. Time lapse live-cell Ca<sup>2+</sup> imaging experiments were conducted for from ~2 HPI until ~18-24 HPI on a Nikon TiE epifluorescence microscope using a SPECTRAX LED light source (Lumencor) and a 20X Plan Apo (NA 0.75) objective. Images were acquired at 1-2 images/minute. Images were acquired and analyzed using the NIS elements advanced research software package (Nikon). Prior to image analysis, background camera noise was subtracted from the images using an averaged file of 10 no-light camera images. Cells that underwent division during the imaging run were excluded from analysis. Intracellular Ca<sup>2+</sup> signaling over time was quantified by calculating the number of Ca<sup>2+</sup> spikes per cell. This was determined as follows: Raw fluorescence intensity values were measured in Nikon software, then exported to Microsoft Excel to normalize the fluorescence to the first image (F/F<sub>0</sub>). The Ca<sup>2+</sup> spikes were calculated by subtracting each normalized fluorescence measurement from the previous measurement to determine the change in GCaMP6s fluorescence (ΔF) between each timepoint. Ca<sup>2+</sup> signals with a ΔF magnitude of >5% were counted as Ca<sup>2+</sup> spikes. For each condition testes, Ca<sup>2+</sup> spikes in ≥30 cells were determined.

**Heatmap generation:** To generate heatmaps of the normalized GCaMP6s fluorescence over time for long-term Ca<sup>2+</sup> imaging experiments we used the TidyR (48) and ggplot2 (49) packages available through R studio. Normalized GCaMP6s data from Excel was used to create a R-compatible file (.csv) containing the normalized fluorescence and the acquisition time data for the dataset, and imported the file into R. We used the TidyR package to organize data into a format accessible by ggplot2. We then used ggplot2 to generate heatmaps.

**Prediction of viroporin motifs *in silico*:** We used the Hydropathy Analysis program at the Transporter Classification Database to generate Kyte & Doolittle Hydropathy and Amphipathic moment plots to identify putative viroporin motifs within full-length TV NS1-2 (50). Secondary structure, membrane topology, and membrane integration predictions were performed using PSIPred prediction analysis suite (website: <http://bioinf.cs.ucl.ac.uk/introduction/>) (51). Helical wheel plots to identify clustered basic residues within the putative viroporin domain were generated using the PepWheel analysis program at Heliquet (website: <http://heliquet.ipmc.cnrs.fr/>) (52).

**Expression vectors:** *E. coli* expression constructs for the lysis assay were generated via ligation-independent cloning (LIC) using the pET46-Ek/LIC kit (MilliporeSigma, Darmstadt, Germany). The pET46-Ek/LIC constructs all have an N-terminal 6x histidine tag. Mammalian expression vectors were generated by inserting c-myc tag and mRuby3 red fluorescent protein upstream of full length NS1-2 and then subcloning this into the pTagRFP-N vector in place of TagRFP (Epoch Life Sciences, Missouri City, TX). This construct will be referred to as RFP-NS1-2. The NS1-2( $\Delta$ 176) and NS1-2( $\Delta$ 157) truncation mutations in both bacterial and mammalian expression vectors were generated using the NEB Q5 site-directed mutagenesis kit (New England Biolabs, Ipswich, MA). All constructs were sequence-verified using universal primers specific to the construct backbone (GENEWIZ, South Plainfield, NJ). The mammalian expression vector for EV 2B was generated by cloning the 2B from enterovirus 71 upstream into pTagRFP-N and the construction of the NSP4-TagRFP expression vector was previously described (53).

**Transfection experiments:** MK2-G6s cells were seeded in 15  $\mu$ -slide 8 well chambers (Ibidi, Germany) and at 85% confluency transfected with mammalian expression constructs in Opti-MEM (ThermoFisher) and Lipofectamine 2000 (Invitrogen). Transfection was optimized so cells received 400 ng plasmid DNA and 0.5  $\mu$ L of Lipofectamine 2000 per well. 10  $\mu$ M trichostatin A (TSA) was added from 1-3 hours post-transfection. TSA is a histone deacetylase (HDAC) inhibitor used to increase expression from the vectors (54–56). Time-lapse  $\text{Ca}^{2+}$  imaging was performed beginning 8 hours post-transfection to capture expression kinetics, and up to 24 hours post-transfection to measure changes in  $\text{Ca}^{2+}$  signaling during expression of the RFP-tagged proteins.

**Deconvolution microscopy:** LLC-MK2 cells were seeded in 15  $\mu$ -slide 8 well chambers (Ibidi, Germany) and transfected one day prior to imaging. Cells were transfected with intracellular markers for the plasma membrane (LCK-GFP; Addgene plasmid #61099), endoplasmic reticulum (pLV-ER GFP; Addgene plasmid #80069), Golgi apparatus (pLV-Golgi GFP; Addgene plasmid #79809), and mitochondria (HyPer-dMito, Envrogen). Control wells received TagRFP (Envrogen), while experimental wells received either full length RFP-NS1-2, RFP-NS1-2( $\Delta$ 157) or RFP-NS1-2( $\Delta$ 176). Cells were imaged 24 hours post-transfection on the DeltaVision LIVE high resolution deconvolution microscope (GE Healthcare) using the 60X/1.4 Plan-Apo NA oil objective (Olympus), and acquired using a pco.edge sCMOS\_5.5 camera. Images were acquired and deconvolved in SoftWoRx software. Upon deconvolving, images were further processed in FIJI (ImageJ) to adjust for brightness/contrast and pseudo-coloring (57).

***E. coli* Lysis Assay:** *E. coli* Lysis assays were performed as previously described (41). Briefly, pET46-Ek/LIC constructs of the TV NS1-2 full-length and truncation mutants were transformed into BL21(DE3)pLysS cells. Transformations were plated on LB + 1% glucose + 100µg/mL ampicillin, + 35µg/mL chloramphenicol and grown at 37°C overnight. Isolated colonies were picked next day and cultured overnight in liquid LB + 1% glucose, + 100µg/mL ampicillin, + 35µg/mL chloramphenicol at 37°C in an orbital shaker at 250 rpm. The next day, overnight cultures were subcultured by 1:100 dilution into 200 mL LB + 1% glucose, + 100µg/mL ampicillin, + 35µg/mL chloramphenicol. Subcultures were grown at 37°C in an orbital shaker at 250 rpm for ~3 hours to an OD<sub>630</sub> between 0.3-0.5, then induced with 1mM IPTG. Absorbance measurements at 630 nm (OD<sub>630</sub>) were taken every 10 minutes for 90 minutes and normalized to the induction OD<sub>630</sub> to determine the percent growth or lysis over time after induction. Each experiment was performed ≥3 times. Protein expression was determined by SDS-PAGE using a 4-20% Tris-glycine gel (Bio-RAD, Hercules, CA) and western blot for the 6x histidine tag. An uninduced culture served as the negative control for viroporin activity and NS1-2 synthesis.

**Membrane association experiment:** Membrane association experiments were performed using a modified protocol from previously reported experiments (36, 41). Lysed membranes from a 200 mL culture were centrifuged at 21,000 x g for 20 minutes and supernatants decanted. Pellets were resuspended in PBS and sonicated 3 times for 1 minute on ice. Total lysate was collected after sonication. Then membranes were pelleted by ultracentrifugation at 49,000 x g for 1 hour using a TLA-100.3 rotor in an Optima TL Ultracentrifuge (Beckman Coulter, Indianapolis, IN), and the supernatant was collected for the soluble fraction. Finally, the

membrane fraction pellet was resuspended in PBS + 1% SDS to solubilize membrane proteins.  
Samples from the total lysate, soluble fraction, and membrane fraction analyzed by western blot.

**Production of TV and Vpg antisera:** For the anti-TV antisera to detect VP1, adult male and female CD-1 mice (purchased from Center for Comparative Medicine, Baylor College of Medicine) were immunized 5 times with CsCl<sub>2</sub>-gradient-purified TV at 10 µg/dose in AddaVax adjuvant (InvivoGen). Immunizations were given at 3-week intervals. For the anti-Vpg antisera, adult Balb/C were immunized 3 times with 10-20 µg/dose purified Vpg expressed in *E. coli*. The priming dose was given in Freund's complete adjuvant and the subsequent boosts were given in Freund's incomplete adjuvant. All experiments were performed in accordance with the recommendations in the Guide for the Care and Use of Laboratory Animals of the National Institutes of Health.

**Immunoblot analysis:** Samples were prepared using procedures adapted from (36). Briefly, samples were mixed with 5X sample buffer containing 2-mercaptonethanol and boiled for 10 minutes at 100°C. Samples were then run on a 4-20% Tris-glycine gel (Bio-RAD, Hercules CA) and transferred onto a nitrocellulose membrane using the Transblot Turbo transfer system (BIO-RAD, Hercules, CA). To detect the bacterial constructs of NS1-2 and NSP4, we used the mouse α-HIS Tag monoclonal antibody at 1:1000 (Genscript, Piscataway, NJ). To detect mammalian expression constructs of NS1-2, we used the mouse α-c-Myc monoclonal (clone 9E10) antibody at 1:1000 (R&D Systems, MN). To detect TV structural protein VP1, we used the mouse α-TV polyclonal we made in-house by hyperimmunizing CD1 mice with purified TV particles. To detect TV nonstructural protein Vpg, we used the mouse α-Vpg polyclonal antibody made by

hyperimmunizing mice with bacterially expressed and purified Vpg. For loading control of mammalian cell lysates, we used the mouse  $\alpha$ -GAPDH at 1:3000 (Novus Biologicals, CO). We used alkaline phosphatase-conjugated goat  $\alpha$ -mouse IgG at 1:2000 (Southern Biotech, Birmingham, AL), and visualized using alkaline phosphatase substrate [Tris-base, nitro blue tetrazolium (NBT), 5-bromo-4-chloro-3-indolyl phosphate (BCIP)].

**Statistical analysis:** Statistical analyses were completed using GraphPad Prism (ver. 7.03). Data in this manuscript is presented as mean  $\pm$  standard deviation. We performed columns statistics to collect descriptive statistics and to determine the normality of the datasets. We then used the unpaired Student's t-test for datasets with a parametric distribution, or a Mann-Whitney test for datasets with a nonparametric distribution. Differences were determined statistically significant if the  $p < 0.05$ . Authors had access to the data for this manuscript, and all authors approved the final manuscript.

**Data availability:** RConsole code for the heatmaps generated in this paper is available upon request.

## Results

**TV infection disrupts host calcium signaling kinetics in LLC-MK2 cells.**  $\text{Ca}^{2+}$  is a ubiquitous secondary messenger and many enteric viruses (*e.g.*, RVs and EVs) require elevated cytosolic  $\text{Ca}^{2+}$  to facilitate replication (30, 36–39, 42, 43). To determine if TV causes aberrant  $\text{Ca}^{2+}$  signaling like other enteric viruses, we examined whether  $\text{Ca}^{2+}$  signaling dynamics changed during TV infection. We infected LLC-MK2 cells stably expressing GCaMP6s (MK2-G6s) with different infectious doses [multiplicity of infection (MOI) 1, 5, 10] or  $\gamma$ -irradiated inactivated TV and performed live-cell fluorescent microscopy during the infection. GCaMP6s is a GFP-based genetically encoded  $\text{Ca}^{2+}$  indicator that reports changes in cytosolic  $\text{Ca}^{2+}$  as an increase in fluorescence (58). TV-infected MK2-G6s cells show increased cytoplasmic  $\text{Ca}^{2+}$  levels (Fig. 1A) beginning at roughly 8 HPI (MOI 10) and progressing for the remainder of the infection (Supplemental Video S1). The observed increase in  $\text{Ca}^{2+}$  signaling coincides with the synthesis of TV nonstructural proteins, assessed by western blot using an  $\alpha$ -Vpg antisera (Fig. 1B) and TV structural proteins, assessed by western blot using an  $\alpha$ -TV antisera to detect VP1 (Fig. 1C), which show increased TV protein production between 8-12 HPI. Further, based on a one-step growth curve, the increased cytosolic  $\text{Ca}^{2+}$  also coincides with the onset of progeny virus production, which occurs between 6-8 HPI (Fig. 1D). The increases in cytosolic  $\text{Ca}^{2+}$  were dynamic during TV infection (Supplemental Video S2). In infected cells, we noted that changes in cytosolic  $\text{Ca}^{2+}$  occurred through an increased number of discrete  $\text{Ca}^{2+}$  signals, much like what we recently observed in RV-infected cells (Fig. 1E) (47). We refer to these high-amplitude, transient  $\text{Ca}^{2+}$  signals as “ $\text{Ca}^{2+}$  spikes” and quantitated the number of  $\text{Ca}^{2+}$  spikes per cell during infection. Compared to uninfected controls, TV-infected cells have significantly more  $\text{Ca}^{2+}$  spikes/cell, but cells inoculated with  $\gamma$ -irradiated TV did not exhibit increased  $\text{Ca}^{2+}$  signaling

(Fig. 1F). Together, these data indicate that increased  $\text{Ca}^{2+}$  signaling requires replication competent virus and occurs at later during infection, well after entry has occurred. Additionally,  $\text{Ca}^{2+}$  signaling in infected cells increases in an infectious dose-dependent manner, saturating at MOI=5 (Fig. 1F). To visualize the aberrant  $\text{Ca}^{2+}$  signaling induced by TV, we generated heatmaps plotting normalized GCaMP6s fluorescence over time (Fig. 1G). Heatmap data shows an increased number and magnitude of  $\text{Ca}^{2+}$  signals and that cytosolic  $\text{Ca}^{2+}$  levels change earlier and more frequently throughout infection as infectious dose increases (Fig. 1G). The heatmaps also show that MK2-G6s cells inoculated with  $\gamma$ -irradiated TV do not have increased  $\text{Ca}^{2+}$  signaling compared to mock-inoculated cells (Fig. 1G), consistent with the lack of increased  $\text{Ca}^{2+}$  spikes (Fig. 1F). Taken together, these data suggest that, like other enteric viruses, TV disrupts host  $\text{Ca}^{2+}$  signaling kinetics during infection.

**Intracellular  $\text{Ca}^{2+}$  is critical for TV replication.** Since we observed aberrant  $\text{Ca}^{2+}$  signaling during TV infection, we sought to determine whether  $\text{Ca}^{2+}$  was involved in TV replication. To test this, we manipulated extracellular and intracellular  $\text{Ca}^{2+}$  levels and determined their effect this had on TV yield. Doubling the extracellular  $\text{Ca}^{2+}$  concentration ( $\sim 4$  mM) did not affect TV yield (Fig. 2A, right). In contrast, TV propagated in  $\text{Ca}^{2+}$ -free media significantly reduced total yield (Fig. 2A, middle). Interestingly, plaques of TV propagated in  $\text{Ca}^{2+}$ -free media were substantially smaller than that propagated in normal media, even though the plaque assay titrations were performed in normal media (Fig. 2C). Next, to investigate the role of intracellular  $\text{Ca}^{2+}$  during infection, we treated LLC-MK2 cells with BAPTA-AM, which chelates cytosolic  $\text{Ca}^{2+}$  and therefore buffers cytosolic  $\text{Ca}^{2+}$  (59, 60). TV replication in  $\text{Ca}^{2+}$ -free media supplemented with BAPTA-AM ( $0\text{Ca}^{2+}$ /BAPTA) was reduced up to 4-log (Fig. 2B), which was



a greater inhibition than  $\text{Ca}^{2+}$ -free media alone (Fig. 2A versus 2B). We next sought to determine whether intracellular  $\text{Ca}^{2+}$  stores are important for TV replication by testing the effect of thapsigargin (TG) on TV replication. TG is an inhibitor of sarco/endoplasmic reticulum  $\text{Ca}^{2+}$  ATPase (SERCA), which pumps cytosolic  $\text{Ca}^{2+}$  into the ER to help maintain ER  $\text{Ca}^{2+}$  stores. We treated TV-infected cells with TG and measured TV yield as above and found that TV replication is  $\sim 3$ -log less in TG-treated than in DMSO-treated cells (Fig. 2B). Finally, we tested these different manipulations of extracellular or intracellular  $\text{Ca}^{2+}$  on TV yield at different time points during infection (8, 16, 24 HPI) (Fig. 2D). These studies confirmed that reduction of extracellular  $\text{Ca}^{2+}$  or treatment with TG significantly inhibited total virus replication; however, the rate of progeny virus production was not substantially reduced. Together, the replication assays demonstrate that intracellular  $\text{Ca}^{2+}$  levels facilitate TV replication, and that the ER  $\text{Ca}^{2+}$  store is particularly important for robust virus production.

**TV-induced  $\text{Ca}^{2+}$  signaling requires ER  $\text{Ca}^{2+}$  stores.** We next sought to determine the effect that the manipulations to extracellular and intracellular  $\text{Ca}^{2+}$  had on the TV-induced  $\text{Ca}^{2+}$  signaling exhibited in Figure 1. We altered extracellular and intracellular  $\text{Ca}^{2+}$  concentrations as above and performed live  $\text{Ca}^{2+}$  imaging of mock and TV-infected MK2-G6s cells. TV-infected cells in 2 mM  $\text{Ca}^{2+}$  (normal media) exhibited increased  $\text{Ca}^{2+}$  signaling, as observed above (Fig. 3A). Supplementing media with additional extracellular  $\text{Ca}^{2+}$  (4 mM  $\text{Ca}^{2+}$  total) did not further increase the  $\text{Ca}^{2+}$  spikes but removing extracellular  $\text{Ca}^{2+}$  abolished the TV-induced  $\text{Ca}^{2+}$  spikes (Fig. 3A). Using heatmaps, we plotted the relative change in GCaMP6s fluorescence over time and observed increased signaling starting at  $\sim 8$  HPI in both the 2 mM  $\text{Ca}^{2+}$  and 4 mM  $\text{Ca}^{2+}$  conditions (Fig. 3B). Further, the heatmaps show that infected cells in  $\text{Ca}^{2+}$ -free media have a

signaling profile that phenotypically mimics uninfected controls (Fig. 3B). Like the results obtained in replication assays, buffering cytoplasmic  $\text{Ca}^{2+}$  using BAPTA-AM reduced the number of  $\text{Ca}^{2+}$  spikes per cell to a level comparable to that of mock-infected cells (Fig. 3C) (Supplemental Video S2). Similarly, blocking the ER SERCA pump with TG significantly reduces TV-induced  $\text{Ca}^{2+}$  signaling (Fig. 3D), supporting replication data and demonstrating that ER  $\text{Ca}^{2+}$  stores are a critical source of  $\text{Ca}^{2+}$  for enhancing replication.

**Tulane virus NS1-2 is targeted to the ER membrane.** Our data indicates that TV activates aberrant  $\text{Ca}^{2+}$  signaling involving the ER  $\text{Ca}^{2+}$  store, much like the dysregulation of  $\text{Ca}^{2+}$  homeostasis by other enteric viruses observed in RV and EV infections. Both RV and EV encode a viroporin, or viral ion channel, that targets the ER  $\text{Ca}^{2+}$  store to activate aberrant  $\text{Ca}^{2+}$  signaling pathways that are critical for virus replication (35, 36, 38, 39, 42, 43). Viroporins are integral membrane proteins that have some common characteristics, including being oligomeric, having an amphipathic  $\alpha$ -helix that serves as the channel lumen through the membrane, and a cluster of basic amino acid residues that facilitate insertion into the membrane (24, 34, 35, 39, 61). Previous work with NS1-2 from several different caliciviruses shows it is membrane-associated and primarily to the ER (17–20, 24) and/or Golgi (17, 20, 21, 23). Thus, we hypothesized that calicivirus NS1-2 could be a viroporin involved in the aberrant  $\text{Ca}^{2+}$  signaling we observed during TV infection. Notably, the calicivirus NS2 domain is the positional homolog of the EV 2B viroporin (Fig. S1). This is potentially significant because previous studies have found conserved functional characteristics between the positional homologs of the other nonstructural proteins (20, 21, 23, 46, 61–64), and functional homology between EV 2AB and human norovirus (HuNoV) GII.4 NS1-2 (20, 23). Additionally, when performing multiple sequence

alignments of other calicivirus NS1-2s, we found that the C-terminal domain (CTD) of this protein is highly conserved (Fig. S2). To determine whether TV NS1-2 has viroporin-like characteristics, we examined TV NS1-2 for viroporin motifs. First, we performed a Kyte-Doolittle plot to detect hydrophobic regions of NS1-2 and an amphipathicity plot to identify potential amphipathic domains (Fig. 4A). We found that aa195-215 (Fig. 4A, dark green box) in the CTD of NS1-2 has a high amphipathic moment. We then used PSIPred (51) to model NS1-2 predicted secondary structure (Fig. 4B). Output from this analysis suggested that the NS1-2 CTD was predominantly comprised of alpha-helices (Fig. 4B, pink residues), and accompanying confidence scores for prediction of these C-terminal helices were  $\geq 75\%$  (Fig. S3). Interestingly, the region of peak amphipathicity (Fig. 4A) was located within one of the PSIPred helix predictions of the CTD (Fig. 4B, dark green bar) and contained clustered basic residues (blue asterisks), two key features of viroporins. Additionally, NS1-2 topology modeling identified two putative transmembrane domains (TMD): the first (TMD1) from aa164-179, and the second (TMD2) from aa202-225 (Fig. 4C, top). The membrane topology schematic indicated that both TMD1 and TMD2 had predicted pore-lining regions within their helices (Fig. 4B bottom left). To explore this, we used HeliQuest (52) to generate a helical wheel diagram for TMD2 (aa198-215), since TMD2 had the clustered basic residues common among viroporins. The helical wheel shows that TMD2 is highly amphipathic with clear polar and non-polar faces to the helix (Fig. 4D). The calculated hydrophobic moment for TMD2 is 0.522, supporting the above amphipathicity predictions (Fig. 4A). Given the results of these computational studies, we predicted that NS1-2 TMD2 (aa195-215) is a viroporin domain and set out to test this prediction experimentally.

First, we tested whether TV NS1-2 was an integral membrane protein and whether it localized to the ER similar to NS1-2 from other caliciviruses. To do so, we generated bacterial and mammalian expression vectors of full-length NS1-2. For mammalian expression vectors, we N-terminally fused full-length NS1-2 to mRuby3 (henceforth referred to as RFP-NS1-2). From these constructs, we generated two truncation mutants of WT NS1-2 in both mammalian and bacterial expression vectors: the first, NS1-2  $\Delta$ 176, was predicted to have TMD1 but lack the viroporin domain, and the second, NS1-2  $\Delta$ 157, was predicted to lack both TMD1 and the VPD. We then transfected wild-type, full-length (WT) RFP-NS1-2, RFP-NS1-2  $\Delta$ 157, and RFP-NS1-2  $\Delta$ 176 into HEK 293FT cells and harvested cell suspensions next day. Samples following cell lysis, sonication, and fractionation were collected for SDS/PAGE western blots. We found both  $\Delta$ 176 and WT TV NS1-2 in the total fraction (T) and membrane pellets (M), but not in the supernatant (S), suggesting that TMD1 mediates membrane association (Fig. 4E). Additionally, in the non-reducing, unboiled conditions used, oligomers of both both  $\Delta$ 176 and WT RFP-NS1-2 were detected by western blot (Fig 4E, arrowheads). Similar results were obtained from membrane fractionation of analogous bacterially expressed NS1-2 constructs (Fig. S4). Using the mammalian expression vectors of RFP-NS1-2, we performed colocalization assays with fluorescent markers of the ER, Golgi apparatus, and mitochondria. RFP-NS1-2 showed no colocalization with the Golgi or mitochondria (Fig. 4F). In contrast, RFP-NS1-2 strongly colocalized with the ER-GFP marker (Fig. 4F), indicating that, like NS1-2 from other caliciviruses and EV 2B and RV NSP4, TV NS1-2 traffics to the ER membrane.

**TV NS1-2 has viroporin activity that disrupts  $\text{Ca}^{2+}$  signaling.** Since our predictive modeling suggested that NS1-2 met the biophysical requirements for a viroporin, and our live-cell  $\text{Ca}^{2+}$

imaging data exhibited large changes in cytosolic  $\text{Ca}^{2+}$  during TV infection, we tested whether NS1-2 has viroporin activity. We performed the *E. coli* lysis assay, which is a classical viroporin functional assay, wherein viroporin expression by BL21(DE3)pLysS *E. coli* results in permeabilization of the inner membrane, resulting in T7 lysozyme-mediated cell lysis (41). This assay has been used to identify and initially characterize many viroporins (36, 65, 66). We expressed full-length HisNS1-2 in BL21(DE3)pLysS cells and measured optical density (OD) over time following protein induction with IPTG. For the lysis assay, strong viroporin activity is characterized by large decreases in OD over time, whereas no viroporin activity is characterized by increases in OD over time. Our results show that induced NS1-2 has strong viroporin activity, similar to that of RV NSP4, our positive control for viroporin activity (Fig. 5A). We see no changes in OD over time for uninduced NS1-2, indicating that HisNS1-2 viroporin activity correlated with protein expression, detected by immunoblot for the 6xHis-tag (Fig. 5B). We then asked whether recombinant expression of RFP-NS1-2 alone increases  $\text{Ca}^{2+}$  signaling in MK2-G6s cells. To test this, we transfected MK2-G6s cells with mammalian expression vectors for RFP-NS1-2 as well as RFP-NSP4 and RFP-EV 2B, our positive controls for viroporin-mediated  $\text{Ca}^{2+}$  signaling. Expressing RFP-tagged viroporins in MK2-G6s cells significantly increases both the number and amplitude of  $\text{Ca}^{2+}$  spikes. However, this was not observed in cells expressing RFP alone, as illustrated by the representative single-cell traces (Fig. 5C) (Supplemental Video S3). As above, we quantitated the number of  $\text{Ca}^{2+}$  spikes and confirmed that recombinant expression of RFP-NS1-2 increased the number of  $\text{Ca}^{2+}$  spikes per cell approximately 2-fold, similar to that of EV 2B and RV NSP4 (Fig. 5D). Taken together, our results demonstrate that TV NS1-2 has viroporin activity in the lysis assay, similar to *bona fide* viroporins, and causes aberrant host  $\text{Ca}^{2+}$  signaling when expressed in mammalian cells.

**NS1-2 viroporin activity maps to the putative viroporin domain.** Our computational studies above identified a putative TV NS1-2 VPD from aa195-212. To determine whether the NS1-2 viroporin activity maps to this putative VPD, we generated C-terminal truncation mutants in bacterial expression vectors with deletions after aa212 (A212-Δ), after aa194 (W194-Δ), or after aa176 (D176-Δ) and characterized them in the lysis assay (Fig. 6A). We found that the A212-Δ truncation (red) had strong lysis activity comparable to full-length NS1-2 (black) (Fig. 6B). In contrast the D176-Δ truncation (blue) exhibited no lysis activity, comparable to uninduced NS1-2 (grey) (Fig. 6B). Immunoblot analysis confirm that protein expression correlated with viroporin activity, and that the impaired activity of W194-Δ was not due to lower expression levels, since the expression was comparable to that of full-length and A212-Δ (Fig 6C). Since the W194-Δ truncation (green) had impaired viroporin activity, this suggests that the VPD functionally extends to aa177-212.

Next, we characterized truncation mutants for their activation of aberrant  $\text{Ca}^{2+}$  signaling in MK2-G6s cells. Since recombinant expression of full-length RFP-NS1-2 induced aberrant  $\text{Ca}^{2+}$  signaling (Fig. 5D), we tested whether truncating the putative viroporin domain alone (Δ176) or both TMDs (Δ157) would compromise NS1-2-induced  $\text{Ca}^{2+}$  signaling (Fig. 6D). First, we examined the subcellular distribution and expression levels of the constructs. While the full-length and Δ176 truncation both appeared reticular, the Δ157 truncation had cytoplasmic distribution, consistent with it lacking both TMDs (Fig. 6E). Immunoblot analysis shows that the expression of both truncations was much greater than that of full-length NS1-2 (Fig. 6F, left blots) and by loading less lysate we can better resolve the 2 kDa size difference in the Δ157 and Δ176 truncations (Fig. 6F, right blots). Next, we examined whether these truncations could

484 induce  $\text{Ca}^{2+}$  signaling by long-term live  $\text{Ca}^{2+}$  imaging in MK2-G6s cells. Individual cell traces  
 485 illustrate that neither the  $\Delta 157$  nor the  $\Delta 176$  truncation dramatically increased  $\text{Ca}^{2+}$  signaling  
 486 similar to full-length RFP-NS1-2 (Fig. 6G). Quantitation of the  $\text{Ca}^{2+}$  spikes per cell showed that  
 487 while both truncations exhibited higher  $\text{Ca}^{2+}$  signaling than RFP alone (Fig 6G), the amplitude of  
 488 these spikes was significantly reduced compared to full-length RFP-NS1-2 (Fig. 6H). The  
 489 significant reduction in the number and amplitude of  $\text{Ca}^{2+}$  spikes/cell for both mutants highlights  
 490 the critical importance of an intact VPD for disrupting host  $\text{Ca}^{2+}$  signaling. Together this work  
 491 demonstrates that TV NS1-2 is an ER-targeted viroporin that induces aberrant  $\text{Ca}^{2+}$  signaling.  
 492

## Discussion

As obligate intracellular pathogens, viruses are adept at exploiting host pathways to facilitate replication. Viruses from many different taxonomic families activate aberrant  $\text{Ca}^{2+}$  signaling because  $\text{Ca}^{2+}$  signals are used by all cells to regulate a vast array of cellular functions. Therefore, this represents a powerful strategy to reconfigure host cell physiology via targeted disruption of host  $\text{Ca}^{2+}$  homeostasis. The overarching goal of this study was to determine whether dysregulation of  $\text{Ca}^{2+}$  signaling is a characteristic of caliciviruses and if this is due to the production of a viroporin protein similar to picornaviruses. To address these questions, we studied TV, as a model calicivirus, using a combination of live-cell  $\text{Ca}^{2+}$  imaging and other classical techniques. The major new findings of this study are as follows: (i) TV infection causes aberrant  $\text{Ca}^{2+}$  signaling that coincides with viral protein synthesis and replication, (ii) cellular  $\text{Ca}^{2+}$  is critical for TV replication and buffering of cytosolic  $\text{Ca}^{2+}$  severely reduced viral yield, (iii) TV NS1-2 has viroporin activity and dysregulates  $\text{Ca}^{2+}$  signaling in mammalian cells similar to TV infection, and (iv) NS1-2 viroporin activity maps to a C-terminal integral membrane viroporin domain and truncation of this domain abrogates the NS1-2-induced activation of  $\text{Ca}^{2+}$  signaling. To our knowledge, these results are the first to show exploitation of  $\text{Ca}^{2+}$  signaling by a calicivirus and identification of NS1-2 as a  $\text{Ca}^{2+}$ -disrupting viroporin. These findings further extend the functional homology between the calicivirus nonstructural proteins and their picornavirus positional homologs.

The exploitation of host  $\text{Ca}^{2+}$  signaling to facilitate virus replication is a common feature of many viruses (30). Our finding that TV coopts  $\text{Ca}^{2+}$  signaling is consistent with previous studies showing that elevated  $\text{Ca}^{2+}$  levels are important for picornavirus replication, especially since caliciviruses and picornaviruses utilize a similar replication strategy (43). Similar to other



Ca<sup>2+</sup>-disrupting viruses, TV also induces aberrant Ca<sup>2+</sup> signaling peak of virus replication, many hours after cell entry. This is consistent with the reduced virus yield in media with reduced extracellular Ca<sup>2+</sup> or treatments to buffer cytosolic Ca<sup>2+</sup> (BAPTA-AM) or block refilling of ER Ca<sup>2+</sup> stores (TG). Further, as we recently reported for RV infection, the TV-induced increase in cytosolic Ca<sup>2+</sup> manifests as many discrete Ca<sup>2+</sup> signals rather than a monophasic increase in Ca<sup>2+</sup> over the infection (47). This raises the question of what cellular pathways are activated by this Ca<sup>2+</sup> signaling and how they benefit TV replication. Both RV and EV have been shown to exploit Ca<sup>2+</sup> signaling to activate the biosynthetic early stages of autophagy, which facilitates virus replication through rearrangement of cellular membranes to form replication complexes (67). MNV infection of primary macrophages or RAW264.7 cell line activates autophagy, but, in contrast to RV and EV, autophagy limits MNV replication (68). Thus, it remains to be determined whether autophagy plays a role in calicivirus replication complex assembly or whether Ca<sup>2+</sup> signaling regulates autophagy activation during calicivirus infection. Further, elevated Ca<sup>2+</sup> signaling may serve to modulate cellular apoptotic responses. Strong monophasic increases in cytosolic Ca<sup>2+</sup> activate apoptosis through mitochondrial Ca<sup>2+</sup> overload, but transient and oscillatory Ca<sup>2+</sup> fluxes serve as pro-survival signals (69). Activation of apoptosis has been seen in norovirus and feline calicivirus-infected cells, and caspase activation is critical for cleavage and release of MNV NS1 from NS1-2, which in turn modulates cellular innate immune responses (19, 22). Thus, increased transient Ca<sup>2+</sup> signaling may serve to counteract apoptosis activation and help prolong cell viability to maximize virus replication.

Within the superfamily of picornavirus-like positive sense RNA viruses, there is positional homology between the ORF1 nonstructural proteins of caliciviruses (and likely astroviruses) and the P2-P3 nonstructural proteins of picornaviruses (23, 45, 46). We used this

framework to determine whether TV NS1-2 exhibited viroporin activity, since the positional homolog, the picornavirus 2B protein, is a well-established  $\text{Ca}^{2+}$ -conducting viroporin (34, 44). We found that TV NS1-2 has viroporin activity, similar to 2B and RV NSP4, and the viroporin activity mapped to the integral membrane NS2 domains. Since both the N- and C-termini are likely oriented in the cytoplasm, NS1-2 is classified as a Class II2 viroporin, similar to the picornavirus 2B proteins (34, 44). This topology is supported by the cytosolic accessibility of the NS1 domain and the need for the C-terminus to also be localized in the cytosol to enable cleavage by the NS6 protease. This raises the question of whether NS1-2 viroporin activity is conserved throughout the *Caliciviridae* family. Though 2B and NS1-2 lack appreciable primary sequence homology, this is not surprising because viroporins, even from the same virus family, often only share the common viroporin motifs (*i.e.*, having [i] an amphipathic  $\alpha$ -helix, [ii] a cluster of basic residues, and [iii] being oligomeric) (33, 38, 39). Among NS1-2 from different caliciviruses, we found that these characteristic features are conserved, so we predict viroporin activity of NS1-2 is a common function. Furthermore, since blunting cytosolic  $\text{Ca}^{2+}$  signaling with BAPTA-AM reduced TV replication, blocking NS1-2 viroporin activity with mutations or drugs should also reduce replication. This is supported by a previous study showing that recombinant coxsackie B3 virus with mutations of the 2B viroporin exhibited significantly impaired replication or were completely replication deficient (70). Analogous studies can be done using the TV reverse genetics system once residues critical for viroporin activity can be identified through mutagenesis screens of the TV NS1-2 viroporin domain we mapped in this study.

The increased  $\text{Ca}^{2+}$  signaling observed in TV-infected cells is phenotypically similar to that induced by recombinant expression of full-length NS1-2, but the  $\text{Ca}^{2+}$  signaling is abrogated

by truncation of the viroporin domain. Further, NS1-2 primarily localized to the ER, which is a major intracellular  $\text{Ca}^{2+}$  storage organelle. Thus, our model predicts that NS1-2 directly releases  $\text{Ca}^{2+}$  from the ER; however, it is likely that both NS1-2 and activation of host  $\text{Ca}^{2+}$  signaling pathways contribute to the observed  $\text{Ca}^{2+}$  signals.  $\text{Ca}^{2+}$  signals from NS1-2 require it to directly conduct  $\text{Ca}^{2+}$  and have a high enough conductance that the ER  $\text{Ca}^{2+}$  release event can be detected by a fluorescent  $\text{Ca}^{2+}$  indicator, yet these unitary events are challenging to detect even for large channels like the IP3R (71). Future studies using patch clamp electrophysiology are needed to confirm that NS1-2 conducts  $\text{Ca}^{2+}$  and determine its conductivity. Nevertheless, based on the similarities between NS1-2 and other  $\text{Ca}^{2+}$ -conducting viroporins, EV 2B and RV NSP4, NS1-2 viroporin activity would reduce ER  $\text{Ca}^{2+}$  levels and this in turn will activate host  $\text{Ca}^{2+}$  signaling pathways. First, the moderately increased steady-state cytosolic  $\text{Ca}^{2+}$  levels could foster more ER  $\text{Ca}^{2+}$  release by potentiating the IP3R  $\text{Ca}^{2+}$  release channel (72). Second, reduced ER  $\text{Ca}^{2+}$  levels activate the store-operated  $\text{Ca}^{2+}$  entry (SOCE) pathway, wherein decreased ER  $\text{Ca}^{2+}$  levels activate the ER  $\text{Ca}^{2+}$  sensing protein stromal interaction molecule 1 (STIM1). Activated STIM1 translocates to ER microdomains adjacent to the plasma membrane and opens  $\text{Ca}^{2+}$  influx channels, like Orai1, to elevate cytosolic  $\text{Ca}^{2+}$  (31, 32). This  $\text{Ca}^{2+}$  influx, in concert with SERCA, helps to refill ER stores for continued signaling.

HuNoV and human sapoviruses cause outbreaks of AGE and are a major cause of foodborne illnesses. However, the molecular mechanisms of how these caliciviruses cause vomiting and diarrhea, the chief symptoms of AGE, have not been characterized. The dysregulation of  $\text{Ca}^{2+}$  signaling by TV may provide insights into the pathophysiology of enteric caliciviruses. Both IP<sub>3</sub>-mediated ER  $\text{Ca}^{2+}$  release and SOCE have been shown to activate chloride secretion from epithelial cells (73, 74). Additionally, in studies of other viroporins, the

viroporin-induced elevated cytosolic  $\text{Ca}^{2+}$  induces cytoskeleton rearrangement, leading to disassembly of tight junctions and loss of barrier integrity (39). Hyperactivation of chloride secretion and loss of tight junctions would contribute to excess fluid secretion and diarrhea. In our study we have shown that dysregulated  $\text{Ca}^{2+}$  signaling is a feature of calicivirus infection using TV. Thus, future studies can further examine the role of aberrant  $\text{Ca}^{2+}$  signaling in calicivirus pathophysiology using human intestinal enteroid cultures that support the replication of many HuNoV strains (4).

In summary, we have shown that TV activates aberrant  $\text{Ca}^{2+}$  signaling during infection, and cellular  $\text{Ca}^{2+}$  is critical for robust TV replication. Further, we found that the NS2 domain of the NS1-2 nonstructural protein is a viroporin that alone induces  $\text{Ca}^{2+}$  signaling similar to TV infection. Together, these results indicate that NS1-2 is functionally analogous to EV 2B and RV NSP4. While little is known about the function(s) of NS1-2, and particularly the NS2 domain of NS1-2, the similarity with other  $\text{Ca}^{2+}$  conducting viroporins may provide a broader insight for understanding NS1-2 functions. Finally, antiviral drugs against viroporins have been developed for influenza M2 and HIV Vpu (34). Thus, the NS1-2 viroporin may be a viable antiviral drug target against caliciviruses.

**Acknowledgments:** This work was supported in part by NIH grants R01DK115507 (PI: J. M. Hyser) and R21AI137710 (CoPI: J. M. Hyser and T. Farkas). Trainee support for A.C.G. was provided by NIH grants F30DK112563 (PI: A.Chang-Graham) and the BCM Medical Scientist Training Program and support for both A.C.G. and A.C.S was provided by the Integrative Molecular and Biomedical Sciences Graduate Program (T32GM008231, PI: D. Nelson). Funding support for the BCM Integrated Microscopy Core includes the NIH (DK56338, CA125123),

608 CPRIT (RP150578, RP170719), the Dan L. Duncan Comprehensive Cancer Center, and the John  
609 S. Dunn Gulf Coast Consortium for Chemical Genomics. We would like to thank Drs. Michael  
610 Mancini and Fabio Stossi for deconvolution microscopy assistance.

611

612 **Primers:**

| Primer name                                | Sequence                                                        |
|--------------------------------------------|-----------------------------------------------------------------|
| pET-46 EK/LIC NS1-2 Fwd                    | GACGACGACAAGATGGATACGTCCATAGATTCTGTGTTATCTGAC<br>ACCAGC         |
| pET-46 EK/LIC NS1-2 Rev                    | GAGGAGAAGCCCGGTTACTGTGGGATCAGTGATGAGGTAAGAAA<br>TGTGATCAAACCTGG |
| pET-46 EK/LIC NS1-2<br>D176 Rev            | GACGACAAGCCCGGTTAATCTTTGACAATAAGGTACACGATCTCG<br>AG             |
| pET-46 EK/LIC NS1-2<br>W194 Rev            | GAGGAGAAGCCCGGTTACCAATTGTGCCAAAGGTTC                            |
| pET-46 EK/LIC NS1-2<br>A212 Rev            | GAGGAGAAGCCCGGTTAAGCAACCCTTGTCAGGAATG                           |
| pET-46 EK/LIC NS1-2<br>Truncations Fwd     | GACGACGACAAGATGGATACGTCCATAGATTCTGTGTTATC                       |
| pET-46 EK/LIC NS1-2 Δ157<br>Rev            | GAGGAGAAGCCCGGTTTATTTGGTCCCTCCGACG                              |
| pET-46 EK/LIC NS1-2 Δ176<br>Rev            | GAGGAGAAGCCCGGTTTAATTGACATCTTTGACAATGAGG                        |
| pTagRFP-N mRuby3-NS1-2<br>Δ157 Q5 Mut. Fwd | CGGAGGGACCTAAAGCGGATGGAC                                        |
| pTagRFP-N mRuby3-NS1-2<br>Δ157 Q5 Mut. Rev | GTCGTACCTATTTTCATTCCAATCTTGACATGTGTG                            |
| pTagRFP-N mRuby3-NS1-2<br>Δ176 Q5 Mut. Fwd | CAAAGATGTCTAATGGGCAAAGATTTG                                     |
| pTagRFP-N mRuby3-NS1-2<br>Δ176 Q5 Mut. Rev | ACAATGAGGTACACGATCTCGAG                                         |

613

614

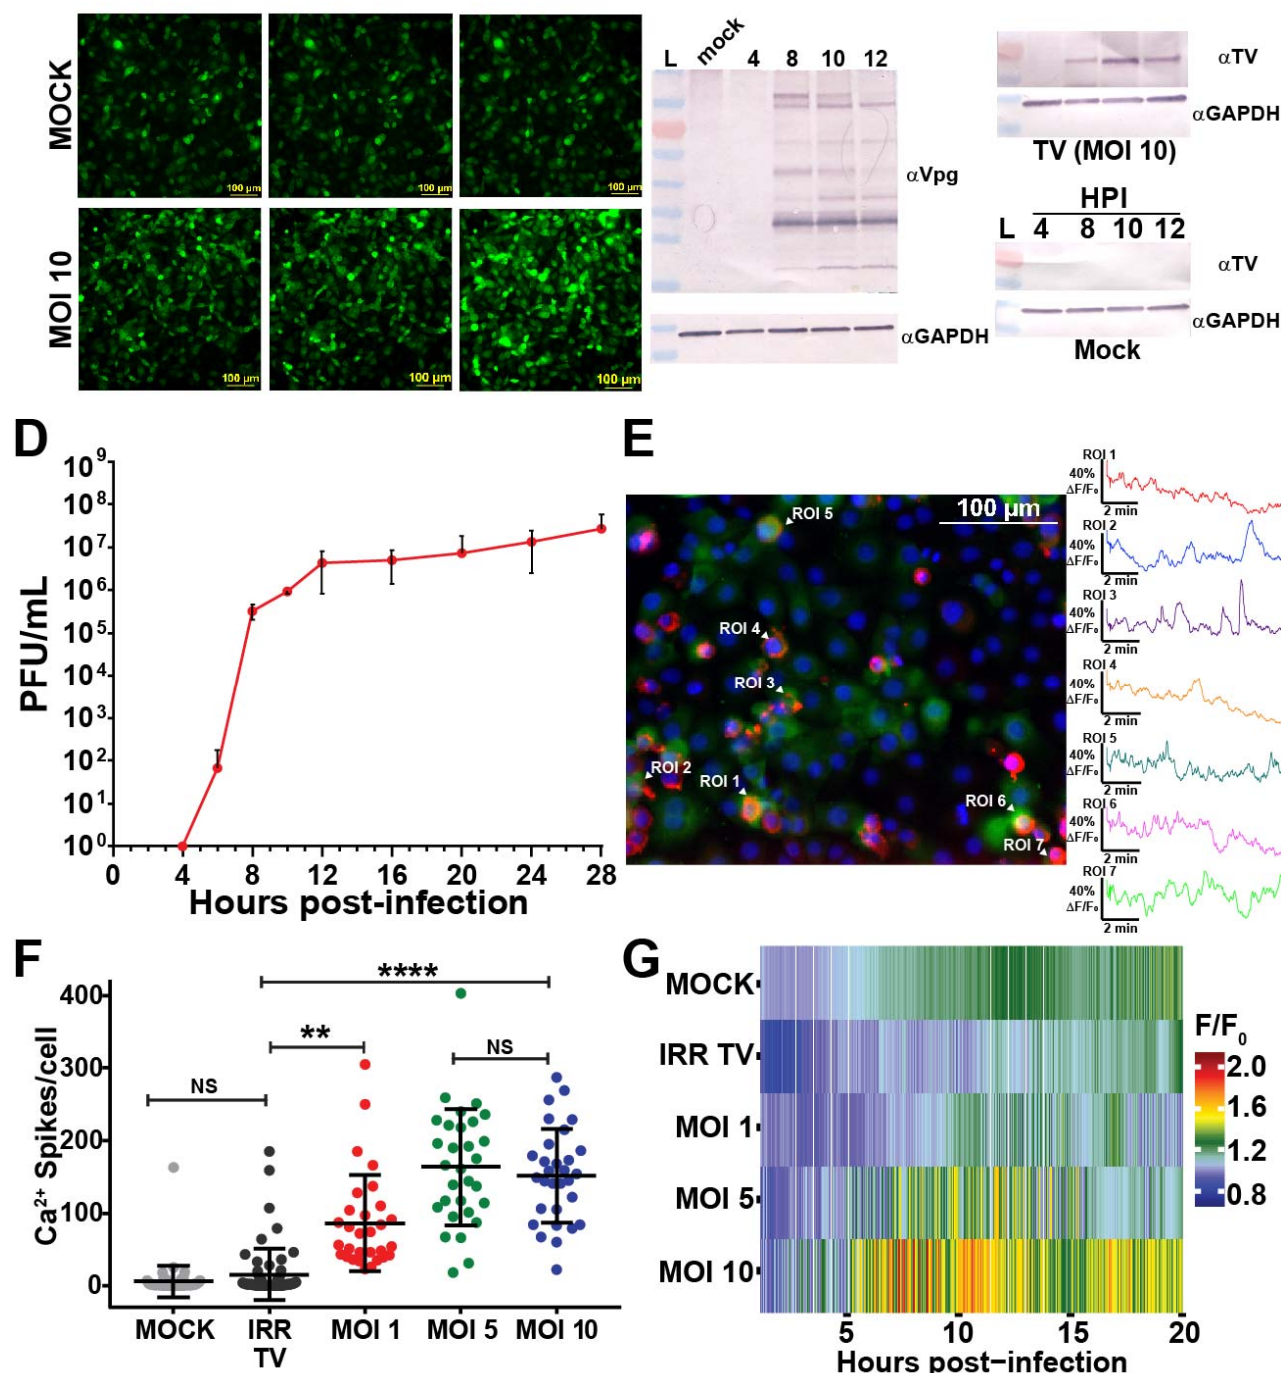

**Figure 1 TV infection disrupts host calcium signaling kinetics in LLC-MK2 cells.**

**A.** Representative images at early (4 HPI), onset (8 HPI), and late (12 HPI) stages of mock (top) and TV-infected (bottom) LLC-MK2 GCaMP6s cells. **B**, **C**. Western blots for nonstructural protein Vpg (B) and structural protein VP1 (C) confirm that aberrant  $\text{Ca}^{2+}$  signaling in infected cells coincides with both structural and nonstructural protein synthesis. **D**. One-step growth curve for TV at a low MOI (1) shows that virus replication is concomitant with viral protein synthesis (1B, C) and with changes in  $\text{Ca}^{2+}$  signaling (1A). **E**. Still from overlay of  $\alpha$ -Vpg staining (red) onto

short (10 minute) continuous imaging runs of TV-infected cells (MOI=5) 12 HPI. Accompanying  $\text{Ca}^{2+}$  cell traces (right) shows the dynamic increases in cytosolic  $\text{Ca}^{2+}$  in infected cells **F**. Compared to mock, TV-infected cells have an increased number of  $\text{Ca}^{2+}$  spikes per cell that increases in an infectious dose-dependent manner, saturating at MOI=5. **G**. Heatmap data suggests that  $\text{Ca}^{2+}$  signaling increases with infectious dose, and that a higher MOI disrupts host  $\text{Ca}^{2+}$  signaling earlier in infection and sustains this aberrant  $\text{Ca}^{2+}$  signaling throughout. Mock and irradiated have similar heatmap profiles, suggesting that replication competent virus is required to drive these changes in  $\text{Ca}^{2+}$  signaling. Data shown as mean  $\pm$  SD. \*\* $p < 0.001$ , \*\*\*\* $p < 0.0001$ .



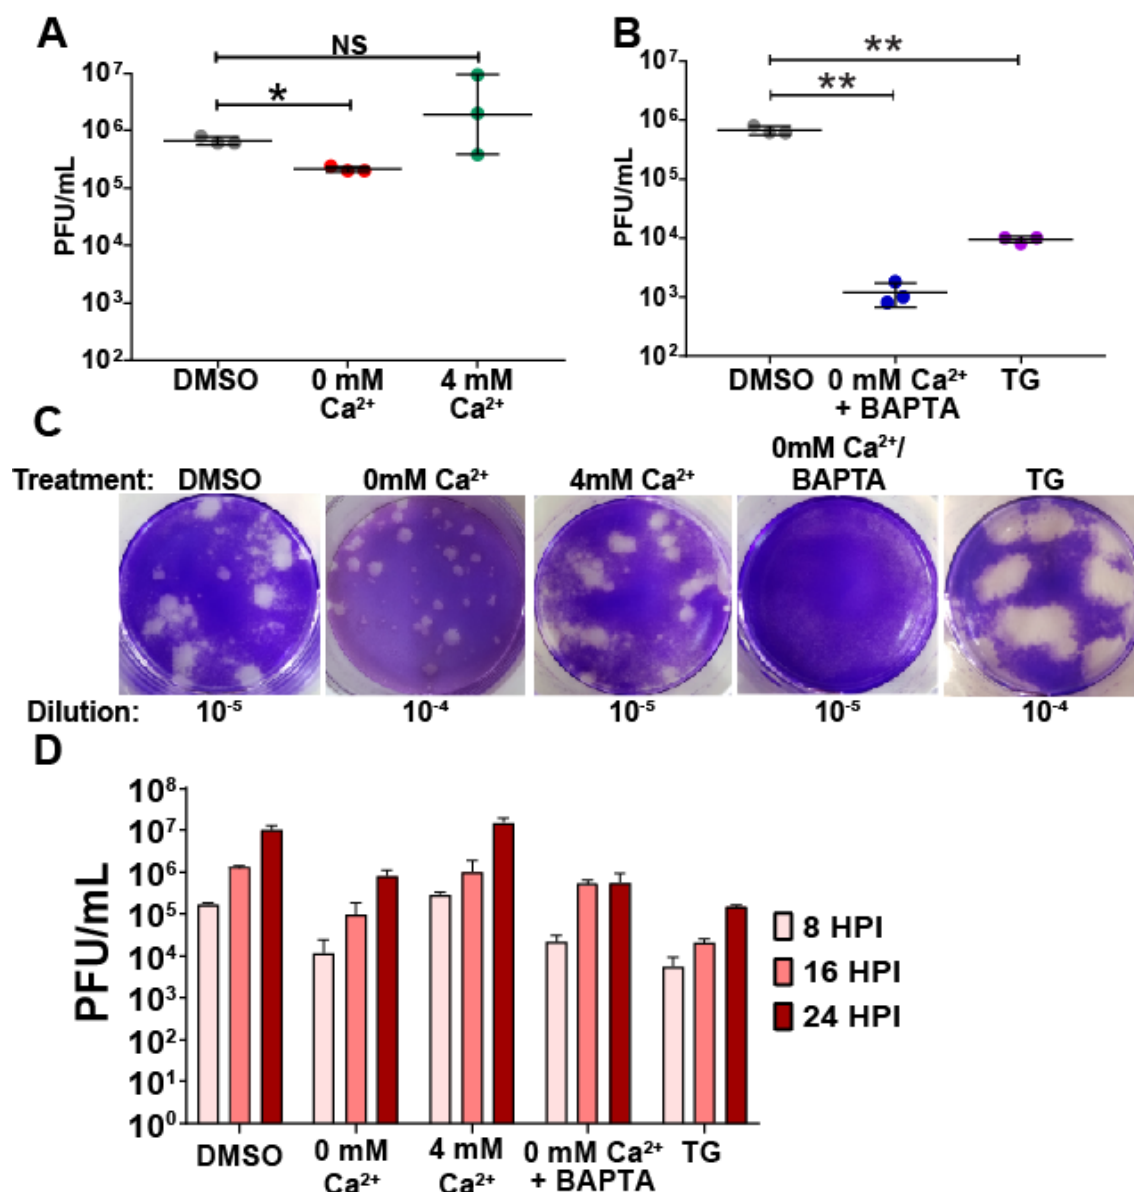

**Figure 2: Intracellular calcium is critical for TV replication.** **A.** Buffering out extracellular calcium hinders TV replication, significantly reducing the total plaque forming units (PFU). In contrast, excess extracellular  $\text{Ca}^{2+}$  (4 mM  $\text{Ca}^{2+}$ , right) does not impact replication. **B.** Buffering intracellular calcium reduces replication. Depleting ER calcium stores with the SERCA-inhibitor thapsigargin and reducing cytoplasmic  $\text{Ca}^{2+}$  with BAPTA-AM significantly reduce TV infectious yield (PFU/mL). **C.** Representative images of plaques under normal (2mM)  $\text{Ca}^{2+}$  conditions (top, DMSO) and reduced  $\text{Ca}^{2+}$  (0 mM  $\text{Ca}^{2+}$ /Bapta-AM, TG), conditions (bottom). **D.** Partial one-step growth curve data altering free intracellular (IC) and extracellular (EC)  $\text{Ca}^{2+}$ . TV replication is stunted in  $\text{Ca}^{2+}$  free IC and EC conditions (0 mM  $\text{Ca}^{2+}$ , 0 mM  $\text{Ca}^{2+}$ /BAPTA-AM). Inhibiting ER  $\text{Ca}^{2+}$  replenishment with thapsigargin also blunts replication, suggesting that IC  $\text{Ca}^{2+}$  stores are critical for TV replication. Data shown as mean  $\pm$  SD. \* $p < 0.01$ , \*\* $p < 0.001$ .

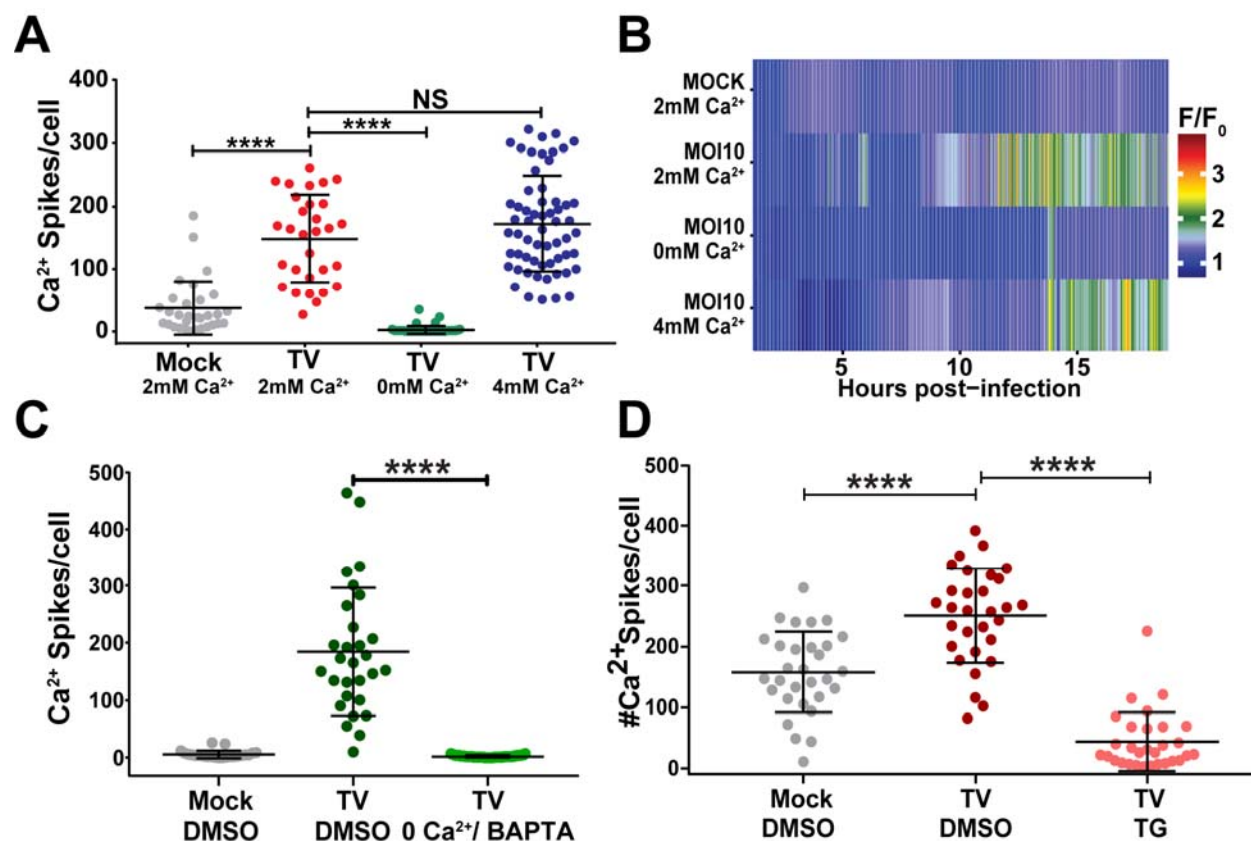

**Figure 3: TV-induced Ca<sup>2+</sup> signaling requires ER Ca<sup>2+</sup> stores.** **A.** Ca<sup>2+</sup>-free media reduces Ca<sup>2+</sup> signaling in TV-infected cells, suggesting Ca<sup>2+</sup> signaling is activated during infection. **B.** TV infection in 0 mM Ca<sup>2+</sup> phenocopies mock Ca<sup>2+</sup> traces in heatmap data, suggesting that EC Ca<sup>2+</sup> facilitates TV infection. **C.** Intracellular Ca<sup>2+</sup> chelator BAPTA-AM abrogated TV-induced Ca<sup>2+</sup> signaling. BAPTA-AM-treated TV-infected cells (light green) returns Ca<sup>2+</sup> signaling to uninfected levels (grey). **D.** Depleting ER Ca<sup>2+</sup> with SERCA blocker thapsigargin (TG) significantly reduces TV-induced Ca<sup>2+</sup> signaling (pink), suggesting that ER Ca<sup>2+</sup> stores are a key source of Ca<sup>2+</sup> leveraged during infection. Data shown as mean  $\pm$  SD. \*\*\*\*p<0.0001.

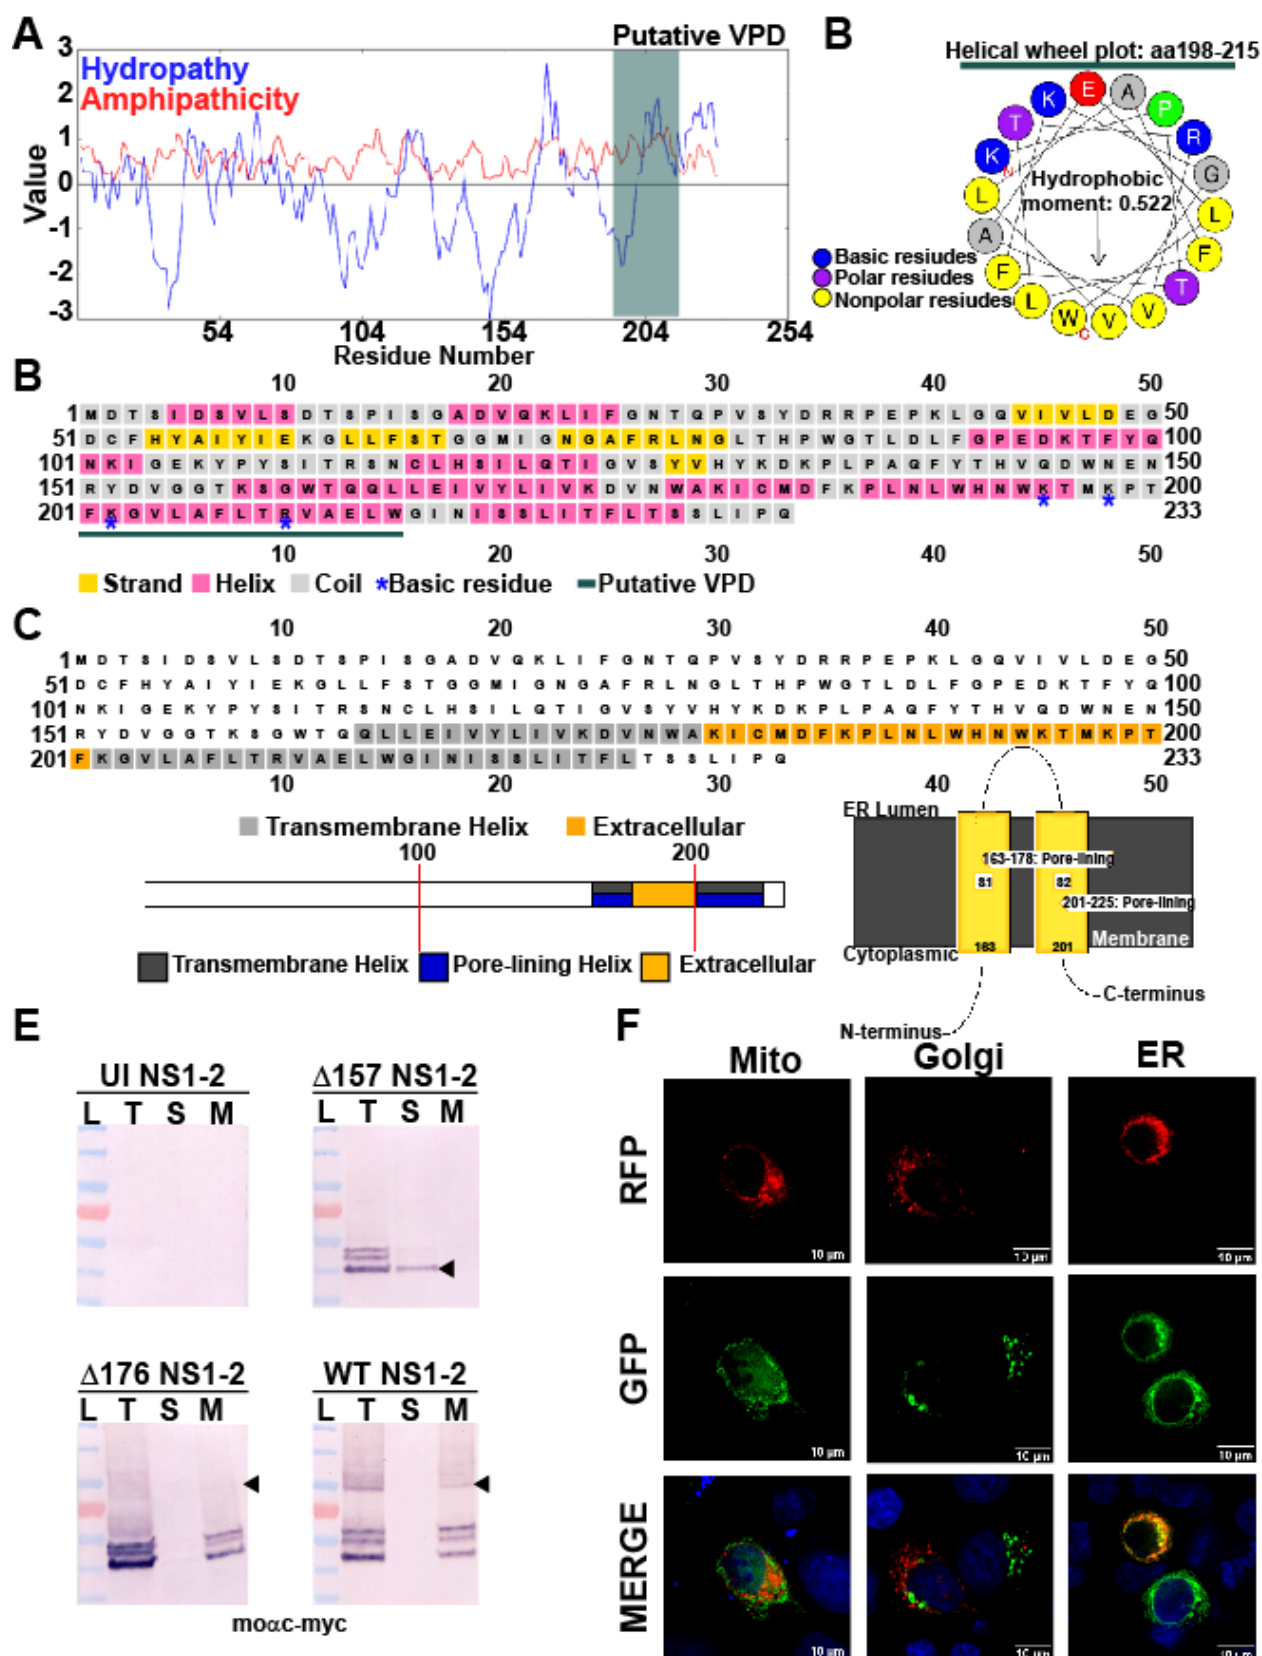

**Figure 4: Tulane virus NS1-2 is targeted to the ER membrane.** **A.** Predictive modeling of TV NS1-2 reveals that it has essential features of *bona fide* vioporins. Kyte-Doolittle-hydrophathy plots predict an amphipathic moment from aa195-212 (dark green bar), consistent with alpha-helical structure required for channel formation. **B.** PSIPred secondary structure algorithms predict the C-terminus of NS1-2 is helical in nature, with the putative vioporin domain (VPD) contained to helices. **C.** PSIPred membrane topology predictions suggest that NS1-2 has two transmembrane helices (grey cubes, top figure). PSIPred algorithms predicting transmembrane helices suggest NS1-2 transmembrane domains are pore-lining (bottom left) and propose a model of membrane insertion and orientation where the putative VPD (aa195-212) comprises the pore-lining helix (bottom right). **D.** Helical wheel plot generated from the NS1-2 amphipathic segment (dark green bar) show clustered basic residues (green asterisks) and a hydrophobic moment of 0.522 from aa198-215, coinciding with the putative VPD. **E.** Mammalian expressed full-length RFP-NS1-2 and RFP NS1-2  $\Delta$ 176 is membrane-associated, but RFP NS1-2  $\Delta$ 157 is not. Both the total fraction (T) and membrane pellets (M) extracted with 1% SDS contain RFP-NS1-2 and  $\Delta$ 176, but centrifuged supernatant (S) does not, suggesting that RFP-NS1-2 and  $\Delta$ 176 are membrane-associated proteins. In contrast, the supernatant contains RFP-NS1-2  $\Delta$ 157. Further, immunoblot assays run under non-reducing conditions show that full-length RFP-NS1-2 and  $\Delta$ 176 oligomerize (black arrowheads). **F.** Co-transfection experiments using intracellular markers for predominant intracellular  $\text{Ca}^{2+}$  stores mitochondria (mito), Golgi, and endoplasmic reticulum (ER) to determine whether TV NS1-2 associated with any intracellular organelle(s). Based on deconvolution microscopy data, RFP-NS1-2 localized to the ER (right), but not with the Golgi (middle). RFP-NS1-2 did not localize to the mitochondria (left) ( $N \geq 2$ ).

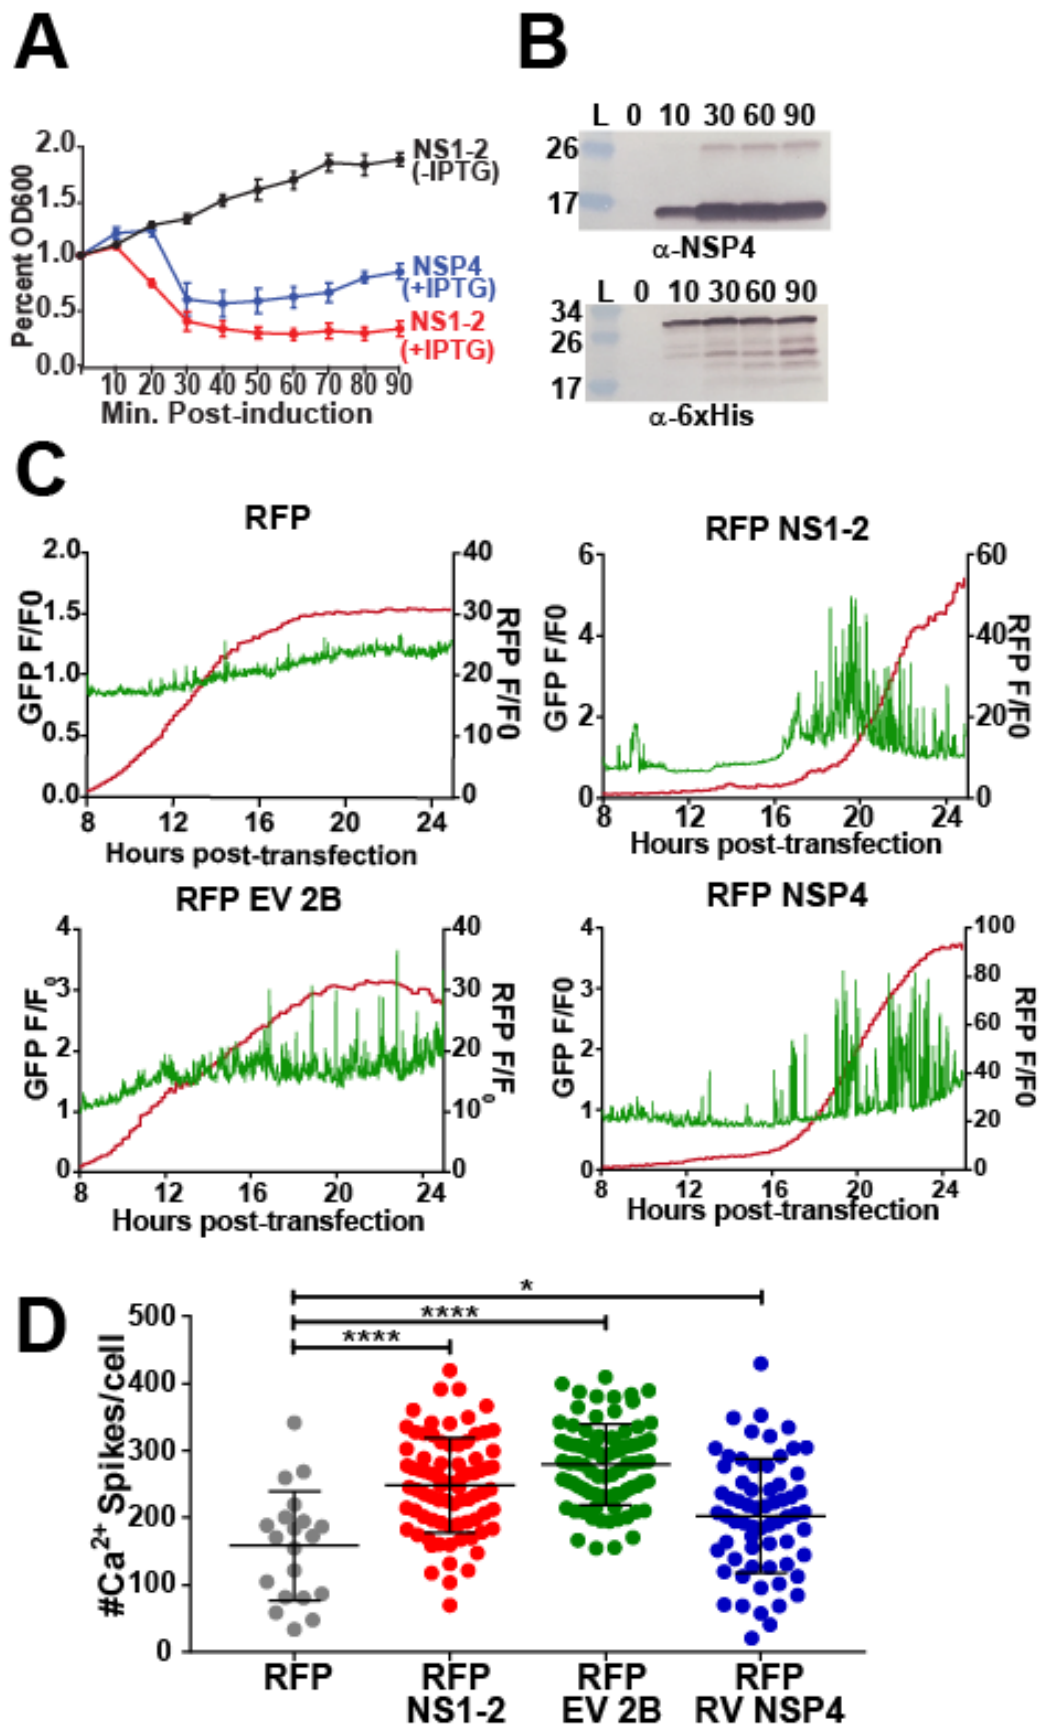

**Figure 5: V NS1-2 has viroporin activity that disrupts  $\text{Ca}^{2+}$  signaling in mammalian cells. A.**

Inducing TV NS1-2 in the lysis assay strongly reduces optical density similar to rotavirus NSP4, the positive control for viroporin activity. B. Western blot data to verify protein expression during the lysis assay for TV NS1-2 (bottom) and RV NSP4 (top). **C, D.** Mammalian recombinant RFP-NS1-2 increases the number (B) and amplitude (C, top row, right) of  $\text{Ca}^{2+}$  spikes when transfected into cells similar to RV NSP4 and EV 2B, the viroporin controls for these experiments. Data shown as mean  $\pm$  SD from  $\geq 8$  fields-of-view. \* $p < 0.01$ , \*\*\*\* $p < 0.0001$ .



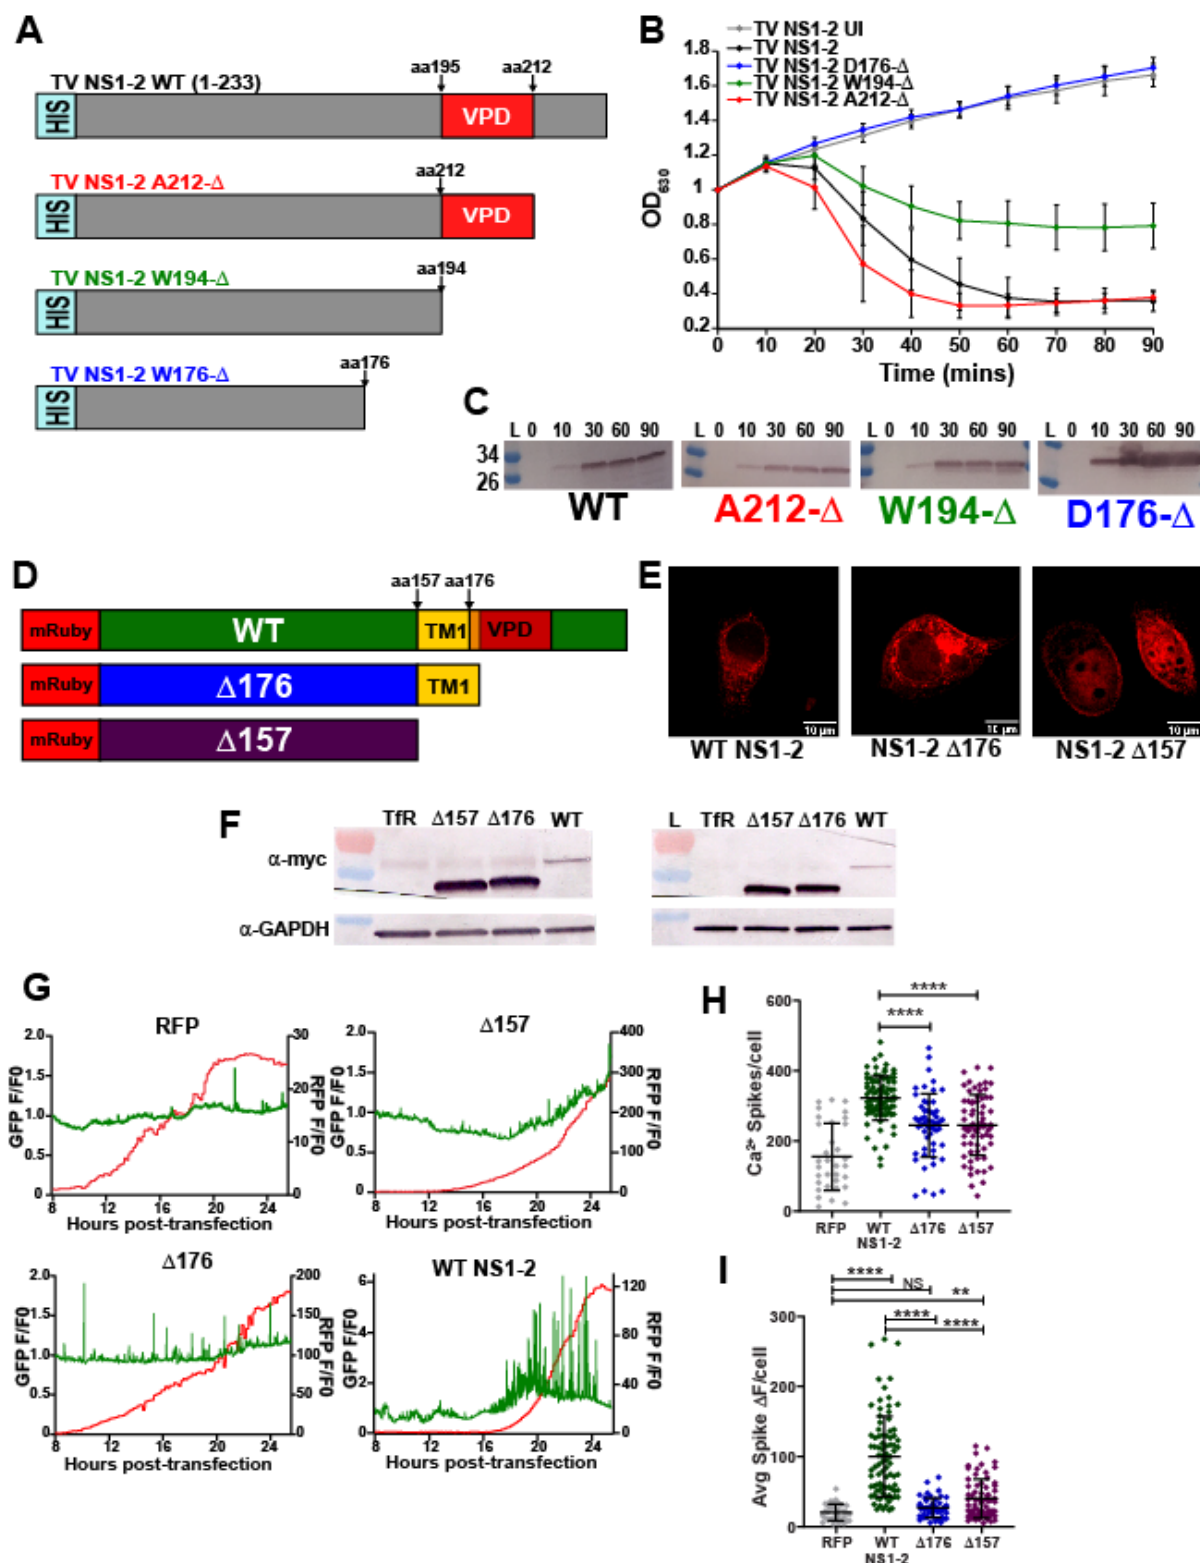

**Figure 6: NS1-2 viroporins mutants do not increase cytoplasmic  $\text{Ca}^{2+}$**  **A.** Schematic of TV NS1-2 C-terminal truncation mutants to functionally map the viroporin domain. **B.** In the lysis assay, truncating the C-terminal domain to amino acid 212 (red) results in wild-type activity

(black), but truncating to W194 (green) impairs activity. Truncating to D176 (blue) abrogates viroporin activity, suggesting the viroporin domain functionally spans from aa177-212. **C.** Western blots verifying protein expression in the lysis assay. **D.** Schematic for the mammalian C-terminal truncation mutant constructs. **E.** IF data for truncation mutants. The  $\Delta 157$  is cytoplasmic (far right), whereas the  $\Delta 176$ , which retains one transmembrane segment, is membrane localized (middle). **F.** Western blot data confirm the  $\Delta 157$  and  $\Delta 176$  mutant constructs. The left blot is run with 20  $\mu\text{L}$ /well to visualize FL NS1-2, whereas the right blot is run with 5  $\mu\text{L}$ /well to resolve the size difference between the  $\Delta 157$  and 176 NS1-2 mutants. **G.** Both the  $\Delta 157$  and  $\Delta 176$  truncation mutants have significantly less  $\text{Ca}^{2+}$  spikes/cell compared to wild-type full length RFP-NS1-2. **H.** Compared to full length RFP-NS1-2, both the  $\Delta 157$  and  $\Delta 176$  truncation mutants have a significant reduced  $\text{Ca}^{2+}$  spike amplitudes, resulting in a change in cytosolic fluorescence ( $\Delta F$ ) that phenotypically mimics RFP alone. Data shown as mean  $\pm$  SD from  $\geq 8$  fields-of-view. \*\* $p < 0.001$ , \*\*\*\* $p < 0.0001$ .



# References

1. Wobus CE, Cunha JB, Elftman M, Kolawole AO. 2016. Animal Models of Norovirus Infection, p. 397–415. *In* Svensson, L, Desselberger, U, Greenberg, HB, Estes, MK (eds.), *Viral Gastroenteritis: Molecular Epidemiology and Pathogenesis*. Academic Press, Cambridge, MA.
2. Kniel KE. 2014. The makings of a good human norovirus surrogate. *Curr Opin Virol* 4:85–90.
3. Desselberger U. 2019. Caliciviridae Other Than Noroviruses. *Viruses* 11:286.
4. Karst SM, Wobus CE, Goodfellow IG, Green KY, Virgin HW. 2014. Advances in norovirus biology. *Cell Host Microbe* 15:668–680.
5. Li J, Predmore A, Divers E, Lou F. 2012. New Interventions Against Human Norovirus: Progress, Opportunities, and Challenges. *Annu Rev Food Sci Technol* 3:331–352.
6. Pendu J Le, Rydell GE, Nasir W, Larson G. 2016. Chapter 3.3 - Human Norovirus Receptors, p. 379–396. *In* Svensson, L, Desselberger, U, Greenberg, HB, Estes, MK (eds.), *Viral Gastroenteritis*. Academic Press, Cambridge, MA.
7. Ettayebi K, Crawford SE, Murakami K, Broughman JR, Karandikar U, Tenge VR, Neill FH, Blutt SE, Zeng X-L, Qu L, Kou B, Opekun AR, Burrin D, Graham DY, Ramani S, Atmar RL, Estes MK. 2016. Replication of human noroviruses in stem cell-derived human enteroids. *Science* (80- ) 353:1387–1393.
8. Bartnicki E, Cunha JB, Kolawole AO, Wobus CE. 2017. Recent advances in understanding noroviruses. *F1000Research* 6:79.
9. Richardson C, Bargatze RF, Goodwin R, Mendelman PM. 2013. Norovirus virus-like particle vaccines for the prevention of acute gastroenteritis. *Expert Rev Vaccines* 12:155–167.
10. Ramani S, Atmar RL, Estes MK. 2014. Epidemiology of human noroviruses and updates on vaccine development. *Curr Opin Gastroenterol* 30:25–33.
11. Farkas T, Sestak K, Wei C, Jiang X. 2008. Characterization of a Rhesus Monkey Calicivirus Representing a New Genus of Caliciviridae. *J Virol* 82:5408–5416.
12. Wei C, Farkas T, Sestak K, Jiang X. 2008. Recovery of Infectious Virus by Transfection of In Vitro-Generated RNA from Tulane Calicivirus cDNA. *J Virol* 82:11429–11436.
13. Smits SL, Rahman M, Schapendonk CME, van Leeuwen M, Faruque ASG, Haagmans BL, Endtz HP, Osterhaus ADME. 2012. Calicivirus from novel reovirus genogroup in human diarrhea, Bangladesh. *Emerg Infect Dis* 18:1192–1195.
14. Goodfellow IG, Taube S. 2016. Calicivirus Replication and Reverse Genetics, p. 355–378. *In* Svensson, L, Desselberger, U, Greenberg, HB, Estes, MK (eds.), *Viral Gastroenteritis: Molecular Epidemiology and Pathogenesis*. Academic Press, Cambridge, MA.
15. Farkas T. 2015. Rhesus enteric calicivirus surrogate model for human norovirus gastroenteritis. *J Gen Virol* 96:1504–1514.

16. Green KY. 2013. The Noroviruses, p. 949–979. *In* Knipe, D, Howley, P (eds.), *Field's Virology*, 6th ed. Wolter Kluwer Health/Lippincott Williams & Wilkins, Philadelphia, PA.
17. Bailey D, Kaiser WJ, Hollinshead M, Moffat K, Chaudhry Y, Wileman T, Sosnovtsev S V., Goodfellow IG. 2010. Feline calicivirus p32, p39 and p30 proteins localize to the endoplasmic reticulum to initiate replication complex formation. *J Gen Virol* 91:739–749.
18. Hyde JL, Mackenzie JM. 2010. Subcellular localization of the MNV-1 ORF1 proteins and their potential roles in the formation of the MNV-1 replication complex. *Virology* 406:138–148.
19. Lee S, Liu H, Wilen CB, Sychev ZE, Desai C, Hykes BL, Orchard RC, McCune BT, Kim K-W, Nice TJ, Handley SA, Baldridge MT, Amarasinghe GK, Virgin HW. 2019. A Secreted Viral Nonstructural Protein Determines Intestinal Norovirus Pathogenesis. *Cell Host Microbe* 1–13.
20. Urakova N, Frese M, Hall RN, Liu J, Matthaei M, Strive T. 2015. Expression and partial characterisation of rabbit haemorrhagic disease virus non-structural proteins. *Virology* 484:69–79.
21. Doerflinger SY, Cortese M, Romero-Brey I, Menne Z, Tubiana T, Schenk C, White PA, Bartenschlager R, Bressanelli S, Hansman GS, Lohmann V. 2017. Membrane alterations induced by nonstructural proteins of human norovirus *PLoS Pathogens*.
22. Lee S, Wilen CB, Orvedahl A, McCune BT, Kim KW, Orchard RC, Peterson ST, Nice TJ, Baldridge MT, Virgin HW. 2017. Norovirus Cell Tropism Is Determined by Combinatorial Action of a Viral Non-structural Protein and Host Cytokine. *Cell Host Microbe* 22:449–459.e4.
23. Fernandez-Vega V, Sosnovtsev S V, Belliot G, King AD, Mitra T, Gorbalenya A, Green KY. 2004. Norwalk virus N-terminal nonstructural protein is associated with disassembly of the Golgi complex in transfected cells. *J Virol* 78:4827–37.
24. Ettayebi K, Hardy ME. 2003. Norwalk virus nonstructural protein p48 forms a complex with the SNARE regulator VAP-A and prevents cell surface expression of vesicular stomatitis virus G protein. *J Virol* 77:11790–7.
25. Jing J, He L, Sun A, Quintana A, Ding Y, Ma G, Tan P, Liang X, Zheng X, Chen L, Shi X, Zhang SL, Zhong L, Huang Y, Dong M-Q, Walker CL, Hogan PG, Wang Y, Zhou Y. 2015. Proteomic mapping of ER–PM junctions identifies STIMATE as a regulator of Ca<sup>2+</sup> influx SUPPLEMENTARY. *Nat Cell Biol* 17:1339–1347.
26. Raffaello A, Mammucari C, Gherardi G, Rizzuto R. 2016. Calcium at the Center of Cell Signaling: Interplay between Endoplasmic Reticulum, Mitochondria, and Lysosomes. *Trends Biochem Sci* 41:1035–1049.
27. Cui C, Merritt R, Fu L, Pan Z. 2017. Targeting calcium signaling in cancer therapy. *Acta Pharm Sin B* 7:3–17.
28. Carafoli E, Krebs J. 2016. Why calcium? How calcium became the best communicator. *J Biol Chem* 291:20849–20857.

- 782 29. Gudermann T, Mederos y Schnitzler M, Dietrich A. 2004. Receptor-Operated Cation  
783 Entry--More Than Esoteric Terminology? *Sci Signal* 2004:pe35–pe35.
- 784 30. Zhou Y, Frey TK, Yang JJ. 2009. Viral Calciomics: Interplays between Ca<sup>2+</sup> and virus.  
785 *Cell Calcium* 46:1–17.
- 786 31. Bagur R, Hajnóczky G. 2017. Intracellular Ca<sup>2+</sup> Sensing: Its Role in Calcium  
787 Homeostasis and Signaling. *Mol Cell* 66:780–788.
- 788 32. Dickson EJ, Jensen JB, Hille B. 2016. Regulation of calcium and phosphoinositides at  
789 endoplasmic reticulum–membrane junctions. *Biochem Soc Trans* 44:467–476.
- 790 33. Nieto-Torres JL, Verdía-Báguena C, Castaño-Rodríguez C, Aguilera VM, Enjuanes L.  
791 2015. Relevance of viroporin ion channel activity on viral replication and pathogenesis.  
792 *Viruses* 7:3552–3573.
- 793 34. Nieva JL, Madan V, Carrasco L. 2012. Viroporins: Structure and biological functions. *Nat*  
794 *Rev Microbiol* 10:563–574.
- 795 35. Sze CW, Tan YJ. 2015. Viral membrane channels: Role and function in the virus life  
796 cycle. *Viruses* 7:3261–3284.
- 797 36. Hyser JM, Collinson-Pautz MR, Utama B, Estes MK. 2010. Rotavirus disrupts calcium  
798 homeostasis by NSP4 viroporin activity. *MBio* 1:1–12.
- 799 37. Van Kuppeveld FJM, De Jong AS, Melchers WJG, Willems PHGM. 2005. Enterovirus  
800 protein 2B po(u)res out the calcium: A viral strategy to survive? *Trends Microbiol* 13:41–  
801 44.
- 802 38. Wang K, Xie S, Sun B. 2011. Viral proteins function as ion channels. *Biochim Biophys*  
803 *Acta - Biomembr* 1808:510–515.
- 804 39. Hyser JM, Estes MK. 2015. Pathophysiological Consequences of Calcium-Conducting  
805 Viroporins. *Annu Rev Virol* 2:473–496.
- 806 40. Hyser JM, Estes MK. 2009. Rotavirus Vaccines and Pathogenesis: 2008. *Curr Opin*  
807 *Gastroenterol* 25:36–43.
- 808 41. Pham T, Perry JL, Dosey TL, Delcour AH, Hyser JM. 2017. The Rotavirus NSP4  
809 Viroporin Domain is a Calcium-conducting Ion Channel. *Sci Rep* 7:1–11.
- 810 42. van Kuppeveld FJ, Galama JM, Zoll J, Melchers WJ. 1995. Genetic analysis of a  
811 hydrophobic domain of coxsackie B3 virus protein 2B: a moderate degree of  
812 hydrophobicity is required for a cis-acting function in viral RNA synthesis. *J Virol*  
813 69:7782–90.
- 814 43. de Jong AS, de Mattia F, Van Dommelen MM, Lanke K, Melchers WJG, Willems  
815 PHGM, van Kuppeveld FJM. 2008. Functional Analysis of Picornavirus 2B Proteins:  
816 Effects on Calcium Homeostasis and Intracellular Protein Trafficking. *J Virol* 82:3782–  
817 3790.
- 818 44. Martinez-Gil L, Bano-Polo M, Redondo N, Sanchez-Martinez S, Nieva JL, Carrasco L,  
819 Mingarro I. 2011. Membrane Integration of Poliovirus 2B Viroporin. *J Virol* 85:11315–

820 11324.

821 45. Koonin E V, Dolja V V. 1993. Evolution and taxonomy of positive-strand viruses:  
822 Implications and analysis of amino acid sequences. *Crit Rev Biochem Mol Biol* 28:375–  
823 430.

824 46. Zell R. 2017. Picornaviridae—the ever-growing virus family. *Arch Virol* 163:1–19.

825 47. Chang-Graham AL, Perry JL, Strtak AC, Ramachandran NK, Criglar JM, Philip AA,  
826 Patton JT, Estes MK, Hyser JM. 2019. Rotavirus Calcium Dysregulation Manifests as  
827 Dynamic Calcium Signaling in the Cytoplasm and Endoplasmic Reticulum. *BioRxiv* 1–  
828 19.

829 48. Hadley A, Henry L. 2019. Package “tidyr”: Easily Tidy Data with “spread()” and  
830 “gather()” Functions.

831 49. Wickham H. 2009. ggplot2: Elegant Graphics for Data Analysis, p. 1–16. *In* Valero-Mora,  
832 PM (ed.), *UseR!* Springer-Verlag, New York.

833 50. Saier MH. 2005. TCDB: the Transporter Classification Database for membrane transport  
834 protein analyses and information. *Nucleic Acids Res* 34:D181–D186.

835 51. Buchan DWA, Jones DT. 2019. The PSIPRED Protein Analysis Workbench: 20 years on.  
836 *Nucleic Acids Res* 1–6.

837 52. Gautier R, Douguet D, Antonny B, Drin G. 2008. HELIQUEST: A web server to screen  
838 sequences with specific  $\alpha$ -helical properties. *Bioinformatics* 24:2101–2102.

839 53. Hyser JM, Utama B, Crawford SE, Broughman JR, Estes MK. 2013. Activation of the  
840 Endoplasmic Reticulum Calcium Sensor STIM1 and Store-Operated Calcium Entry by  
841 Rotavirus Requires NSP4 Viroporin Activity 87:13579–13588.

842 54. Nan X, Hyndman L, Agbi N, Porteous DJ, Boyd AC. 2004. Potent stimulation of gene  
843 expression by histone deacetylase inhibitors on transiently transfected DNA. *Biochem*  
844 *Biophys Res Commun* 324:348–354.

845 55. Lu HK, Gray LR, Wightman F, Ellenberg P, Khoury G, Cheng WJ, Mota TM, Wesselingh  
846 S, Gorry PR, Cameron PU, Churchill MJ, Lewin SR. 2014. Ex vivo response to histone  
847 deacetylase (HDAC) inhibitors of the HIV long terminal repeat (LTR) derived from HIV-  
848 infected patients on antiretroviral therapy. *PLoS One* 9.

849 56. Paszkiet BJ, Zhang J, Matukonis M, Kaleko M, Luo T. 2016. Histone Deacetylation  
850 Inhibitors Enhance Lentiviral Vector Production and Infectivity. *Mol Ther* 5:S308.

851 57. Schneider CA, Rasband WS, Eliceiri KW. 2012. NIH Image to ImageJ: 25 years of image  
852 analysis. *Nat Methods* 9:671–5.

853 58. Chen T-W, Wardill TJ, Sun Y, Pulver SR, Renninger SL, Baohan A, Schreiter ER, Kerr  
854 RA, Orger MB, Jayaraman V, Looger LL, Svoboda K, Kim DS. 2013. Ultrasensitive  
855 fluorescent proteins for imaging neuronal activity. *Nature* 499:295–300.

856 59. Billman GE. 1993. Intracellular calcium chelator, BAPTA-AM, prevents cocaine-induced  
857 ventricular fibrillation. *Am J Physiol Circ Physiol* H1529–H1535.

60. Horvath B, Szentandrassy N, Veress R, Baranyai D, Kistamas K, Almasy J, Toth A, Magyar J, Banyasz T, Nanasi PP. 2018. Effect of the intracellular calcium concentration chelator BAPTA acetoxymethyl ester on action potential duration in canine ventricular myocytes. *J Physiol Pharmacol* 69:99–107.
61. Gonzalez ME, Carrasco L. 2003. Viroporins. *FEBS Lett* 552:28–34.
62. Neil JD. 1990. Nucleotide sequence of a region of the feline calicivirus genome which encodes picornavirus-like RNA-dependent RNA polymerase, cysteine protease and 2C polypeptides. *Virus Res* 17:145–160.
63. Kuyumcu-Martinez M, Belliot G, Sosnovtsev S V., Chang K-O, Green KY, Lloyd RE. 2004. Calicivirus 3C-Like Proteinase Inhibits Cellular Translation by Cleavage of Poly(A)-Binding Protein. *J Virol* 78:8172–8182.
64. Venkataraman S, Prasad BVLS, Selvarajan R. 2018. RNA dependent RNA polymerases: Insights from structure, function and evolution. *Viruses* 10:1–23.
65. Lama J, Carrasco L. 1992. Expression of poliovirus nonstructural proteins in *Escherichia coli* cells. *J Biol Chem* 267:15932–15937.
66. Guinea R, Carrasco L. 1994. Influenza virus M2 protein modifies membrane permeability in *E. coli* cells. *FEBS Lett* 343:242–246.
67. Crawford SE, Estes MK. 2013. Viroporin-mediated calcium-activated autophagy 797–798.
68. Furlong K, Hwang S. 2019. Autophagy and Noroviruses. *Viruses* 11:244.
69. Krebs J, Agellon LB, Michalak M. 2015. Ca<sup>2+</sup> homeostasis and endoplasmic reticulum (ER) stress: An integrated view of calcium signaling. *Biochem Biophys Res Commun* 460:114–121.
70. van Kuppeveld FJ, Galama JM, Zoll J, van den Hurk PJ, Melchers WJ. 1996. Coxsackie B3 virus protein 2B contains cationic amphipathic helix that is required for viral RNA replication. *J Virol* 70:3876–3886.
71. Lock JT, Alzayady KJ, Yule DI, Parker I. 2018. All three IP 3 receptor isoforms generate Ca<sup>2+</sup> puffs that display similar characteristics. *Sci Signal* 11:eaau0344.
72. Taylor CW, Tovey SC. 2010. IP3 Receptors: Toward Understanding Their Activation. *Cold Spring Harb Perspect Biol* 1–23.
73. Jin X, Shah S, Du X, Zhang H, Gamper N. 2016. Activation of Ca<sup>2+</sup>-activated Cl<sup>-</sup> channel ANO1 by localized Ca<sup>2+</sup> signals. *J Physiol* 594:19–30.
74. Concepcion AR, Vaeth M, Wagner LE, Eckstein M, Hecht L, Jun Y, Crottes D, Seidl M, Shin HP, Weidinger C, Cameron S, Turvey SE, Issekutz T, Meyts I, Lacruz RS, Cuk M, Yule DI, Feske S. 2016. Store-operated Ca<sup>2+</sup> entry regulates Ca<sup>2+</sup>-activated chloride channels and eccrine sweat gland function. *J Clin Invest* 126:4303–4318.
